# Supplementary material for: Endogenous metabolites of vitamin E limit inflammation by targeting 5-lipoxygenase
Source: PubMed Central journal article supplement (PMC6148290; doi:10.1038/s41467-018-06158-5), 2018-09-20
Supplement: 41467_2018_6158_MOESM1_ESM.pdf [file 41467_2018_6158_MOESM1_ESM.pdf]

1 **Supplementary information**

2

3 **Endogenous metabolites of vitamin E limit inflammation by targeting**

4 **5-lipoxygenase**

5

6 Pein et al.

7

8

## 1 **Supplementary Figures**

2 Supplementary Fig. 1 | Endogenous metabolites of vitamin E inhibit 5-LO to suppress inflammation.

3 Supplementary Fig. 2 | Molecular docking simulations.

4 Supplementary Fig. 3 | Administration of  $\alpha$ -T (**1a**) to mice with established peritonitis neither elevates  
5 LCM levels in the peritoneal exudate nor in infiltrated peritoneal cells.

6 Supplementary Fig. 4 | Design of the human liver-on-chip and  $\alpha$ -T-13'-COOH (**4a**) biosynthesis.

7 Supplementary Fig. 5 |  $\delta$ -TE-13'-COOH (**4h**) preferentially inhibits the formation of 5-LO-derived  
8 products within eicosanoid biosynthesis.

9 Supplementary Fig. 6 | Time-dependent immune cell infiltration into the peritoneal cavity in zymosan-  
10 induced murine peritonitis.

11 Supplementary Fig. 7 | Effect of  $\alpha$ -T-13'-COOH (**4a**) on the lipid mediator profiles of peritoneal  
12 exudates and plasma during resolution of mouse peritonitis.

13 Supplementary Fig. 8 | Uncropped Western blots.

14 Supplementary Fig. 9 | Multi-step strategy for the semi-synthesis of  $\alpha$ -TE-13'-CH<sub>2</sub>OH (**2e**)

15 Supplementary Fig. 10 | Multi-step strategy for the semi-synthesis of  $\beta$ -TE-13'-CH<sub>2</sub>OH (**2f**)

16 Supplementary Fig. 11 | Semi-synthesis of methyl 19,20-dihydro- $\delta$ -garcinoate

17 Supplementary Fig. 12 | Semi-synthesis of  $\delta$ -DE-13'-COOH (**4l**).

18 Supplementary Fig. 13 | Semi-synthesis of  $\delta$ -TE-13'-CONHBz (**7**).

19

## 20 **Supplementary Tables**

21 Supplementary Table 1 | Docking scores for Ts, TEs, LCMs and vitamin E derivatives

22 Supplementary Table 2 | Amino acid sequence alignment of human LO isoenzymes

23 Supplementary Table 3 | Conditions for the quantitation of LCMs by UPLC-MS/MS

24 Supplementary Table 4 | Plasma and exudate levels of vitamin E metabolites in mouse peritonitis

25 Supplementary Table 5 | Sequence of wildtype 5-LO and site-directed mutants in the expression vectors

26 5-LO\_wt, 5-LO\_3W and 5-LO\_Arg101Asp

27

## 28 **Supplementary Notes**

29 Supplementary Note 1 | Semi-synthesis of LCMs

30

## 31 **Supplementary references**

1 **Supplementary Figures**

**a**

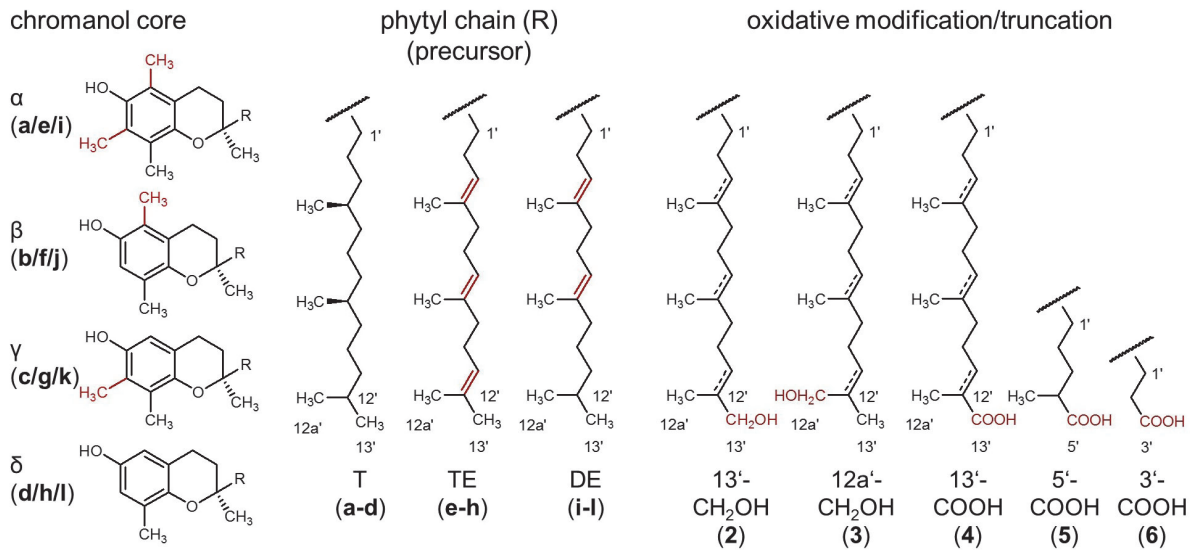

**b**

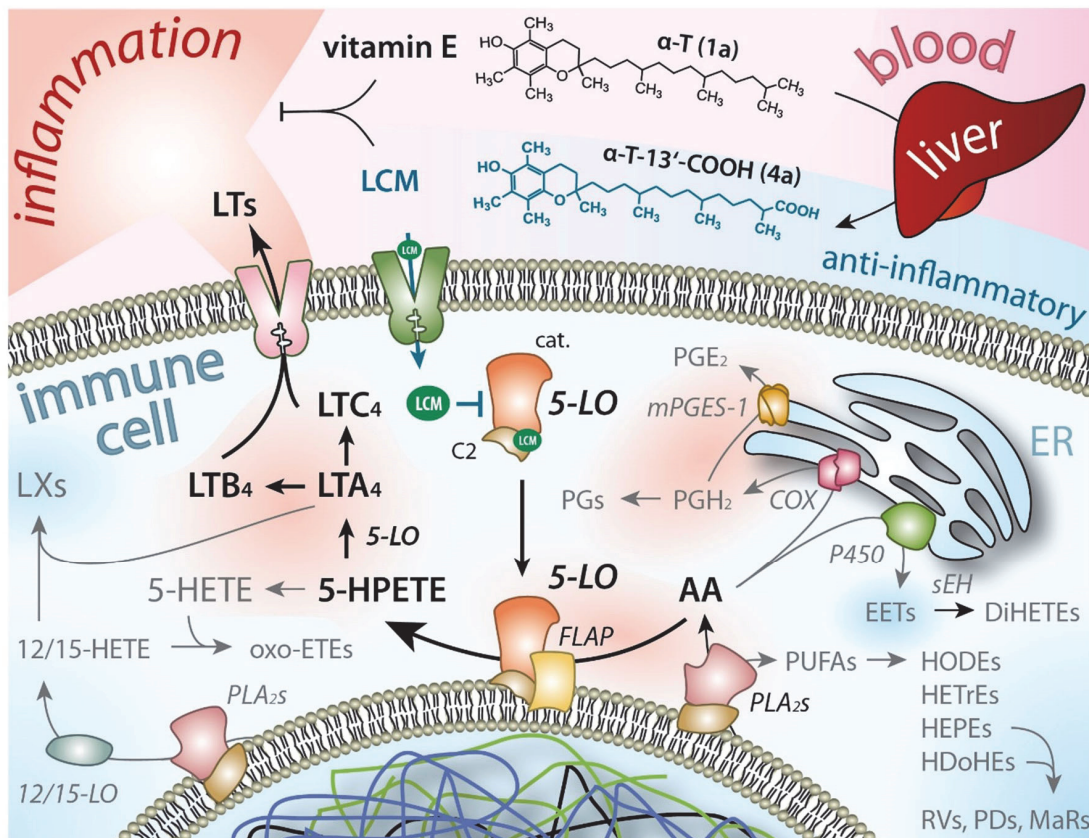

2

3 **Supplementary Fig. 1** Endogenous metabolites of vitamin E inhibit 5-LO to suppress inflammation. **a**  
 4 Natural vitamin E forms and metabolites. Abbreviations used: T, tocopherols; TE, tocotrienols; DE,  
 5 tocodienols. **b** Schematic overview about eicosanoid and docosanoid biosynthesis. The biosynthesis of  
 6 leukotrienes (LTs) in immune cells is initiated by phospholipases (PL)<sub>A2</sub>, which release  
 7 polyunsaturated fatty acids (PUFAs) such as arachidonic acid (AA) from membrane phospholipids. AA  
 8 is transferred by 5-LO-activating protein (FLAP) to 5-LO at the nuclear membrane, dioxygenized to 5-  
 9 hydroperoxy-eicosatetraenoic acid (5-HPETE) and either reduced to 5-hydroxy-eicosatetraenoic acid  
 10 (5-HETE) or rearranged to LTA<sub>4</sub> by the LTA<sub>4</sub> synthase activity of 5-LO. Conversion of LTA<sub>4</sub> to LTB<sub>4</sub>

1 and cysteinyl-LTs (*i.e.*, LTC<sub>4</sub>) yields potent mediators of inflammation. In concert with cyclooxygenase  
2 (COX) isoenzymes, cytochrome P450 monooxygenases (P450) and other enzymes, LOs (5-, 12-, 15-  
3 LO) produce a large spectrum of pro-inflammatory/non-resolving and anti-inflammatory/pro-resolving  
4 lipid mediators. Mode of action of LCMs:  $\alpha$ -T (**1a**, vitamin E) is metabolized in the liver to  $\alpha$ -T-13'-  
5 COOH (**4a**, LCM), which binds to 5-LO as high-affinity inhibitor at the interface of the catalytic (cat.)  
6 and regulatory C2-like domains.  $\alpha$ -T-13'-COOH (**4a**) is released from the liver and present in plasma  
7 at concentrations that are sufficient to inhibit 5-LO, accumulates in immune cells at inflammatory sites  
8 and counteracts acute inflammation by suppressing LT formation. Abbreviations used: DiHETE,  
9 dihydroxy-eicosatetraenoic acid; EET, epoxy-eicosatrienoic acid; ER, endoplasmic reticulum; HDoHE,  
10 hydroxy-docosahexaenoic acid; HEPE, hydroxy-eicosapentaenoic acid; HETrE, hydroxy-  
11 eicosatrienoic acid; HODE, hydroxy-octadecadienoic acid; LXs, lipoxins; MaRs, maresins; oxo-ETE,  
12 5-oxo-eicosatetraenoic acid; PDs, protectins; RVs, resolvins; sEH, soluble epoxide hydrolase.  
13

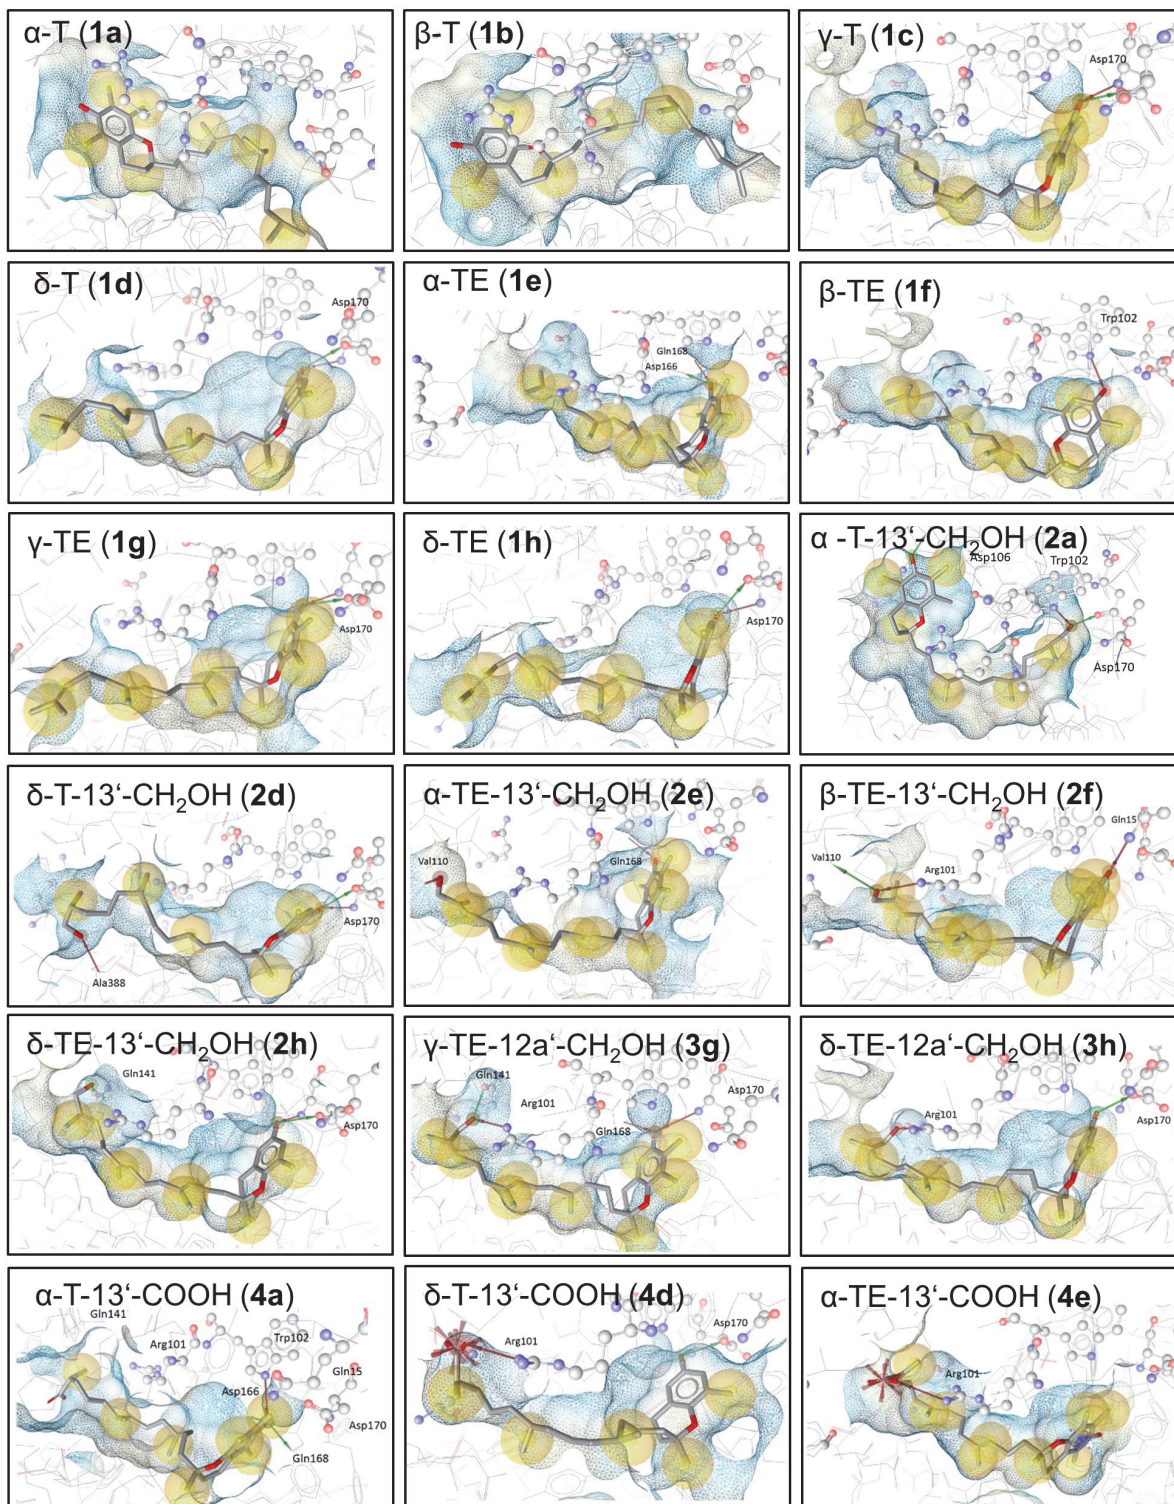

1  
2



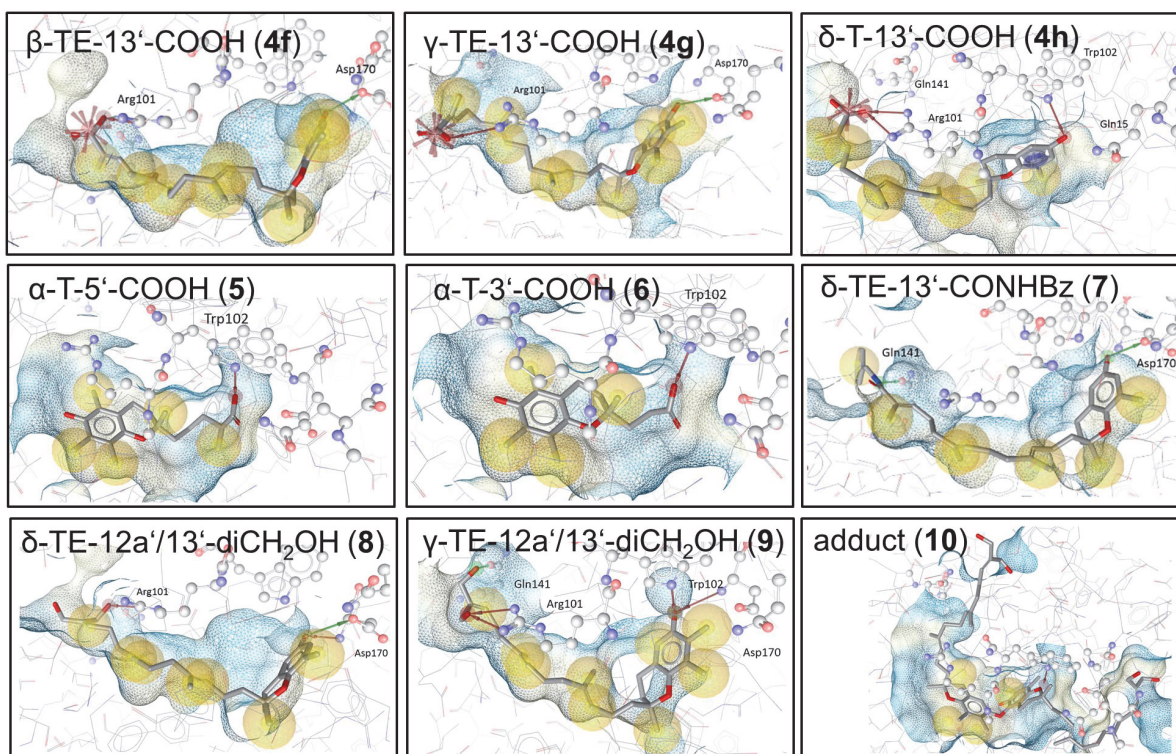

1  
2  
3  
4  
5

**Supplementary Fig. 2** Molecular docking simulations of 5-LO. Simulations show the interaction with Ts, TEs, LCMs,  $\delta$ -TE-13'-CONHBz (7),  $\delta$ -TE-12a'/13'-diCH<sub>2</sub>OH (8),  $\gamma$ -TE-12a'/13'-diCH<sub>2</sub>OH (9) and the adduct (10) at the interface of the catalytic and regulatory C2-like domains.

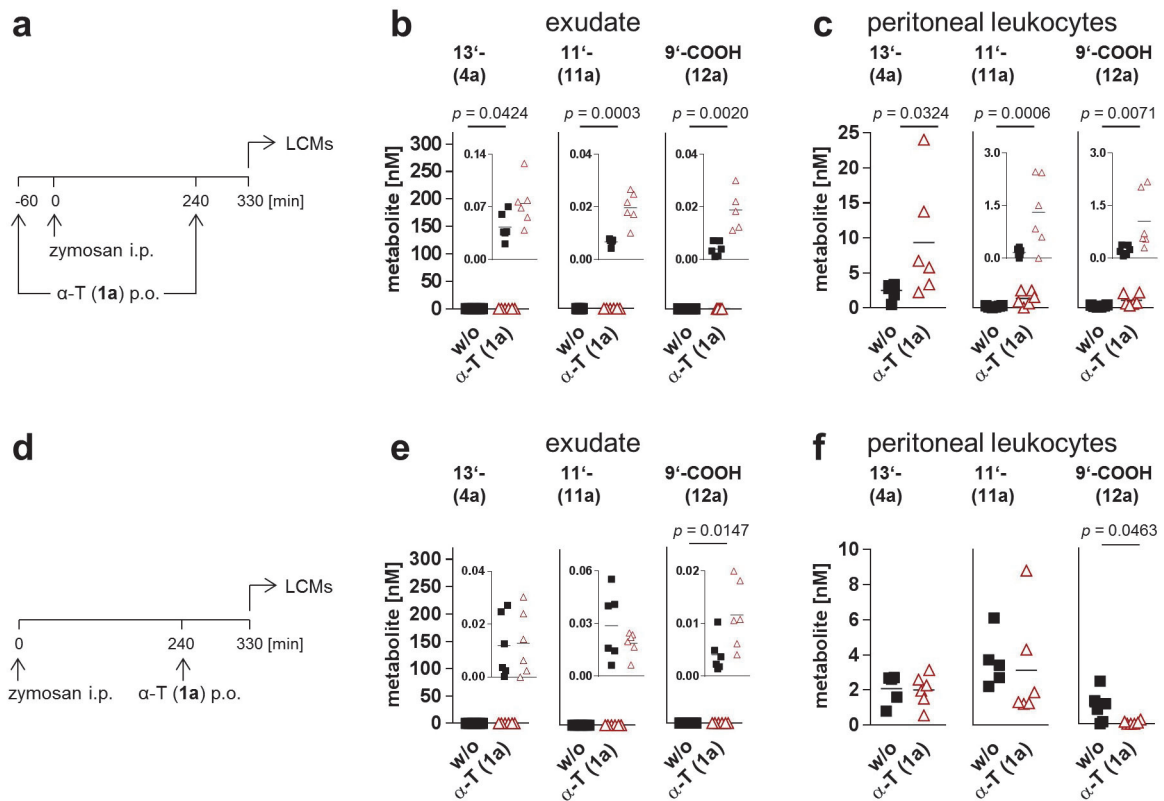

1

2 **Supplementary Fig. 3** Administration of  $\alpha$ -T (**1a**) to mice with established peritonitis neither elevates  
 3 LCM levels in the peritoneal exudate nor in infiltrated peritoneal cells. **a, d** Time-scales for zymosan-  
 4 induced murine peritonitis. **b, c, e, f** Concentration of  $\alpha$ -T-13'-COOH (**4a**),  $\alpha$ -T-11'-COOH (**11a**) and  
 5  $\alpha$ -T-9'-COOH (**12a**) in peritoneal exudates (**b, e**) and infiltrated peritoneal cells (**c, f**) of mice with  
 6 acute peritonitis 5.5 h post zymosan injection.  $\alpha$ -T (50 mg/kg) was either administered p.o. twice (1 h  
 7 before plus 4 h after zymosan; **b, c**) or once (4 h after zymosan; **e, f**). **c, f** Average intracellular  
 8 concentrations were calculated for spherical peritoneal cells with a diameter of 13  $\mu$ m. Mean  
 9 with single data from  $n = 6$  mice, except for **b**: w/o,  $\alpha$ -T-11'-COOH (**11a**) and  $\alpha$ -T (**1a**),  $\alpha$ -T-9'-  
 10 COOH (**12a**) with  $n = 5$  mice. Two-tailed unpaired student  $t$ -test.

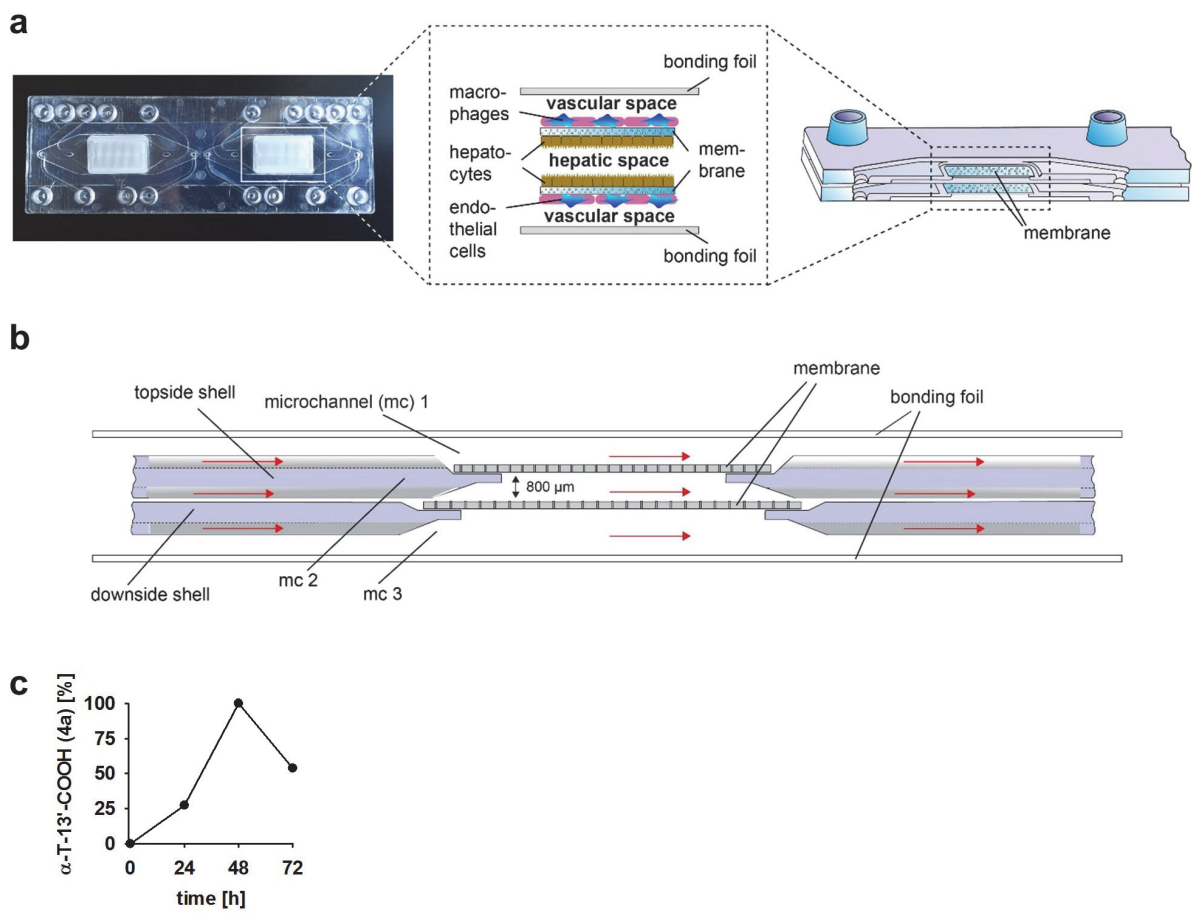

1  
2  
3  
4  
5  
6  
7  
8  
9

**Supplementary Fig. 4** Design of the human liver-on-chip and  $\alpha\text{-T-}^{13}\text{-COOH (4a)}$  biosynthesis. **a** Composition of the biochip-based human liver model. **b** Cross section of the microfluidic biochip. Vascular layers comprised of HUVEC and differentiated primary human monocyte-derived macrophages were cultured statically in micro-channels 1 and 3. Micro-channel 2 was used to build up a hepatic compartment comprised of human HepaRG hepatocytes and human LX-2 stellate cells. **c** Time-dependent production of  $\alpha\text{-T-}^{13}\text{-COOH (4a)}$  by differentiated HepaRG cells (HepaRG biochip). Mean from  $n = 2$  independent experiments.



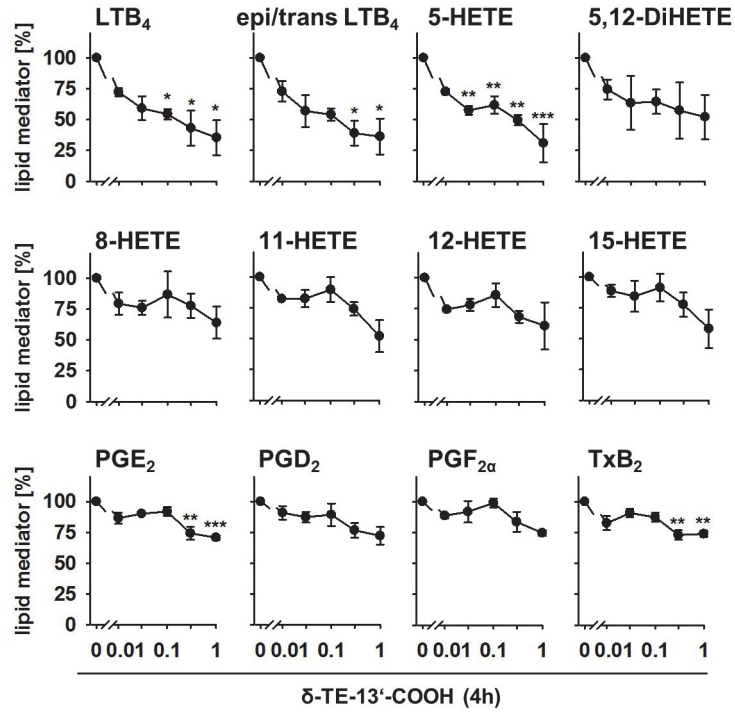

1  
2  
3  
4  
5  
6  
7  
8

**Supplementary Fig. 5**  $\delta$ -TE-13'-COOH (**4h**) preferentially inhibits the formation of 5-LO-derived products within eicosanoid biosynthesis. Effect of  $\delta$ -TE-13'-COOH (**4h**) on the eicosanoid profile in A23187/AA-treated monocytes that were pre-activated with LPS. (Di)HETE, (di)hydroxy-eicosatetraenoic acid; Tx, thromboxane. Mean  $\pm$  s.e.m.; n = 3 independent experiments. \* $P$  < 0.05, \*\* $P$  < 0.01, \*\*\* $P$  < 0.001 vs. vehicle control; repeated measures one-way ANOVA + Tukey HSD *post hoc* tests.

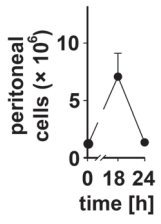

1  
2  
3  
4  
5

**Supplementary Fig. 6** Time-dependent immune cell infiltration into the peritoneal cavity in zymosan-induced murine peritonitis. Mean + s.e.m. for n = 10 (0 h), n = 4 (18 h), n = 6 (24 h) mice.

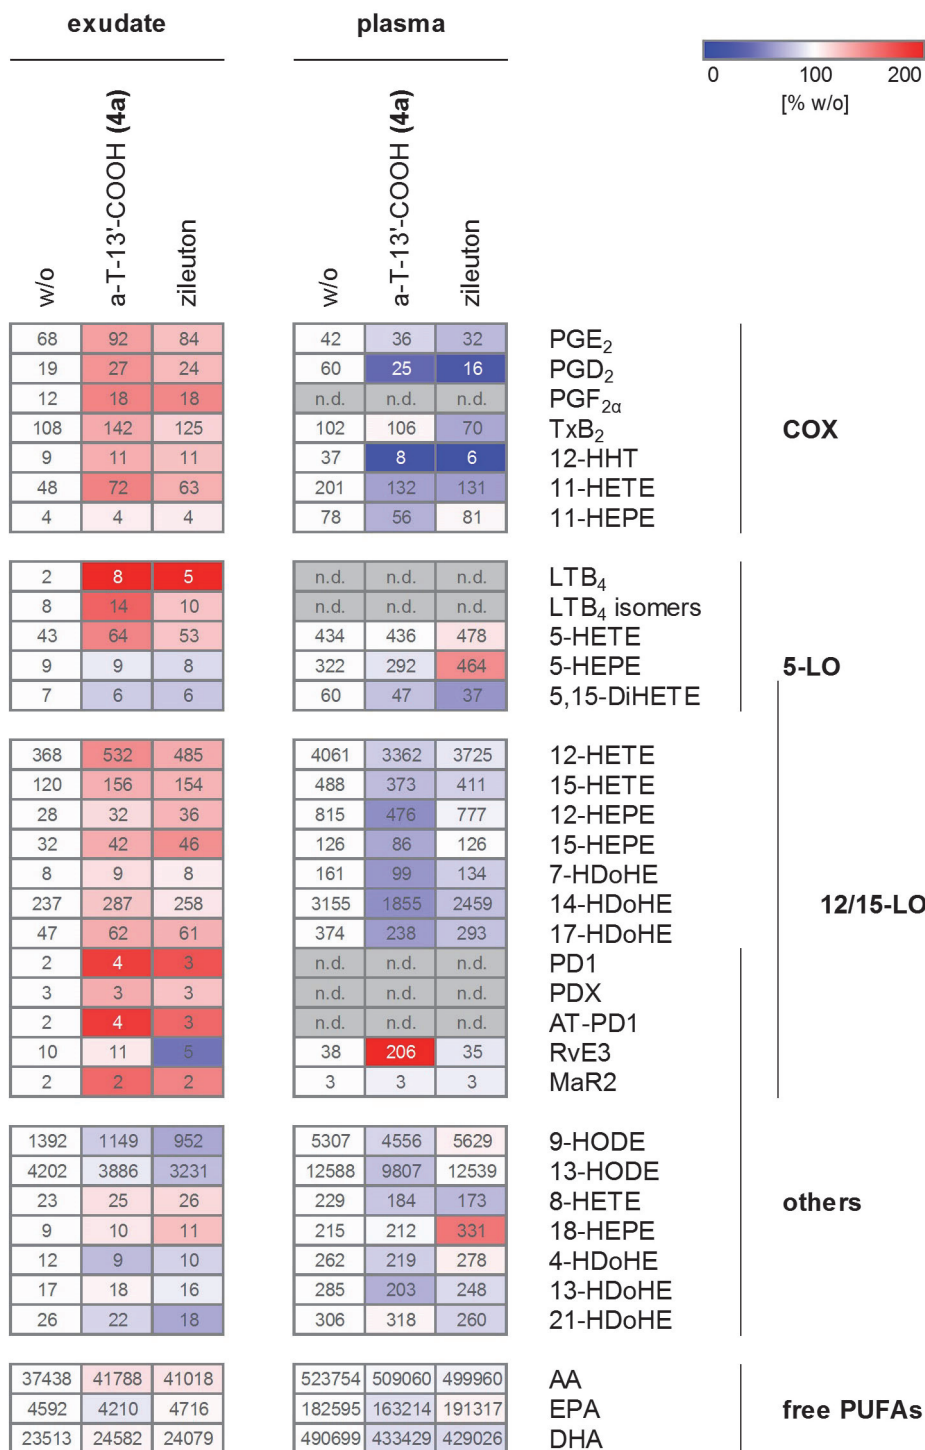

1  
2  
3 **Supplementary Fig. 7** Effect of  $\alpha$ -T-13'-COOH (4a) on the lipid mediator profiles of peritoneal  
4 exudates and plasma during resolution of mouse peritonitis. Vehicle (DMSO),  $\alpha$ -T-13'-COOH (4a) or  
5 zileuton (10 mg/kg, i.p., each) were administered to mice, which were killed at 18 h post zymosan  
6 injection as indicated in Fig. 5. Lipid mediator profiles were analyzed in the exudate and plasma by  
7 UPLC-MS/MS. Mean from n = 6 mice. The color scale refers to changes in the percentage of lipid  
8 mediators vs. vehicle control. The inserted values give the concentrations of lipid mediators in pg/ml.  
9 Tx, thromboxane; HHT, hydroxy-heptadecatrienoic acid; HEPE, hydroxy-eicosapentaenoic acid;  
10 (Di)HETE, (di)hydroxy-eicosatetraenoic acid; HDoHE, hydroxy-docosahexaenoic acid; (AT)-P,  
11 (apirin-triggered) protectin; Rv, resolvin; MaR, maresin; HODE, hydroxy-octadecadienoic acid; EPA,  
12 eicosapentaenoic acid; DHA, docosahexaenoic acid.

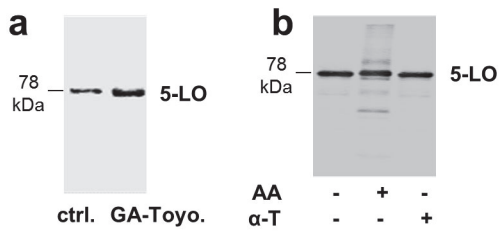

1  
2  
3  
4  
5

**Supplementary Fig. 8** Uncropped Western blots. **a, b** Uncropped Western blots from **Fig. 1e. (a)** and **Fig. 1f (b)**.

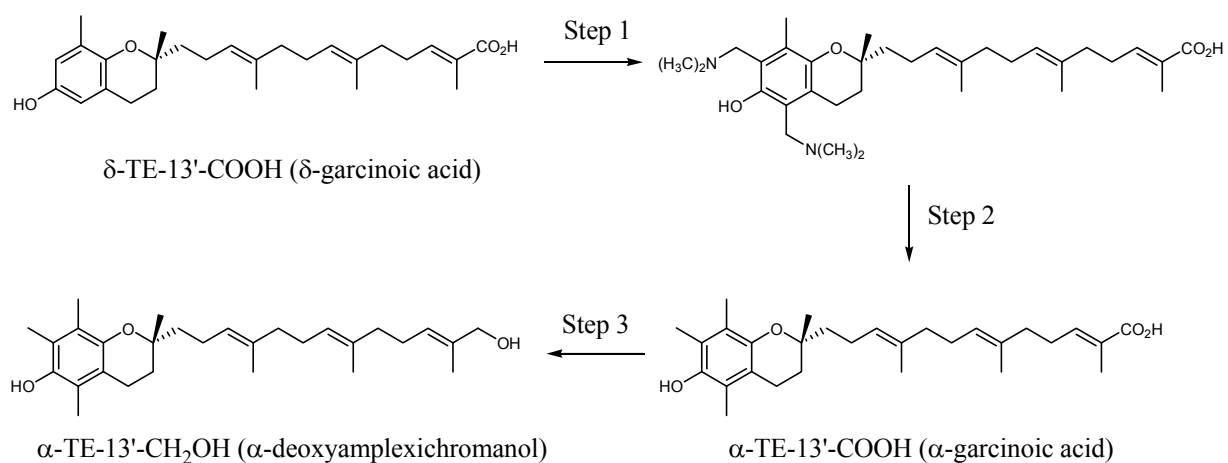

1

2

3

**Supplementary Fig. 9.** Multi-step strategy for the semi-synthesis of  $\alpha$ -TE-13'-CH<sub>2</sub>OH (**2e**)



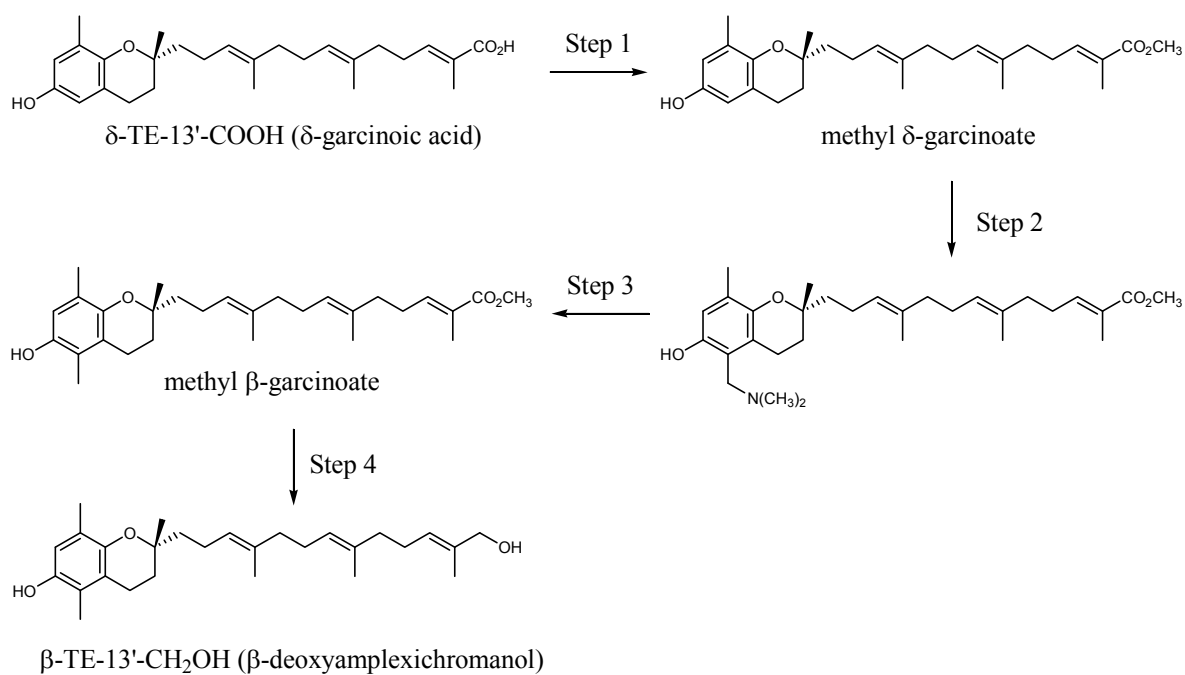

1  
2  
3  
4

**Supplementary Fig. 10.** Multi-step strategy for the semi-synthesis of  $\beta$ -TE-13'-CH<sub>2</sub>OH (**2f**)

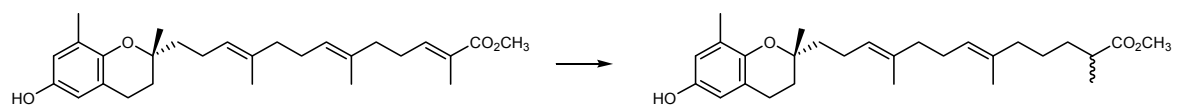

1  
2  
3  
4  
5

**Supplementary Fig. 11.** Semi-synthesis of methyl 19,20-dihydro- $\delta$ -garcinoate

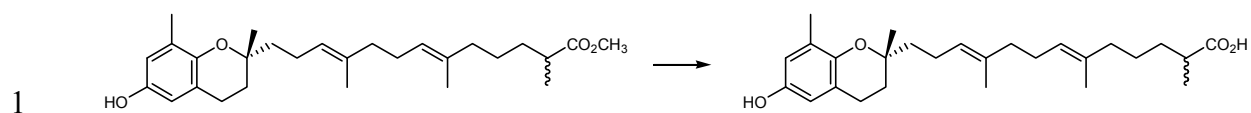

2 **Supplementary Fig. 12.** Semi-synthesis of  $\delta$ -DE-13'-COOH (**41**).

3

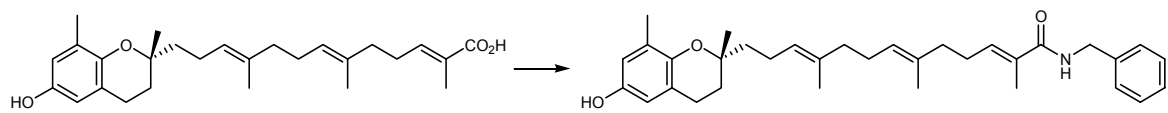

1  
2  
3  
4  
5

**Supplementary Fig. 13.** Semi-synthesis of  $\delta$ -TE-13'-CONHBz (**7**).

1 **Supplementary Tables**

2

3 **Supplementary Table 1** Docking scores for Ts, TEs, LCMs and vitamin E derivatives

4 Ts, TEs and LCMs

|                             | T            |             |              |              | TE           |             |              |              |
|-----------------------------|--------------|-------------|--------------|--------------|--------------|-------------|--------------|--------------|
|                             | $\alpha$ (a) | $\beta$ (b) | $\gamma$ (c) | $\delta$ (d) | $\alpha$ (e) | $\beta$ (f) | $\gamma$ (g) | $\delta$ (h) |
| vitamin E (1)               | 56.6         | 59.7        | 59.0         | 55.8         | 58.9         | 48.9        | 56.2         | 59.8         |
| 13'-CH <sub>2</sub> OH (2)  | 60.2         |             |              | 52.3         | 50.1         | 51.6        |              | 64.7         |
| 12'a-CH <sub>2</sub> OH (3) |              |             |              |              |              |             | 51.2         | 68.7         |
| 13'-COOH (4)                | 50.0         |             |              | 52.1         | 45.8         | 52.5        | 47.8         | 51.1         |

5

6 **Derivatives**

|                                                |      |
|------------------------------------------------|------|
| $\alpha$ -T-5'-COOH (5)                        | 57.1 |
| $\alpha$ -T-3'-COOH (6)                        | 61.3 |
| $\delta$ -TE-13'-CONHBz (7)                    | 46.0 |
| $\delta$ -TE-12a'/13'-diCH <sub>2</sub> OH (8) | 62.2 |
| $\gamma$ -TE-12a'/13'-diCH <sub>2</sub> OH (9) | 55.9 |
| adduct (10)                                    | -0,8 |

7 Ligands were docked into the proposed LCM binding site at the interface of the regulatory C2-  
 8 like domain and catalytic domain of 5-LO, and the highest score for each ligand is given. The  
 9 ChemPLP scoring function is designed to predict ligand binding and includes a term for the  
 10 binding free energy as well as other binding parameters<sup>1</sup>.

11



1 **Supplementary Table 2** Amino acid sequence alignment of human LO isoenzymes

|         | 13                 | 102                                |
|---------|--------------------|------------------------------------|
| 5-LO    | YTVTVATGSQWFAGTDDY | -GDYIEFFPCYRWITGDVEVVLDRDGRAKLARDD |
| 12-LO-1 | YRIRVATGAWLFSGSYNR | ACAEVAFFPCYRWVQGEDILSLPEGTARLPGDN  |
| 12R-LO  | YKVRVATGTDLLSGTRDS | NGRIYHFPAYQWMDGYETLALREATGKTTADD   |
| 15-LO-1 | YRIRVSTGASLYAGSNNQ | AGDEVRFPCYRWVEGNGVLSLPEGTGRTVGED   |
| 15-LO-2 | FRVRVSTGEAFGAGTWDK | RGHLLFPCYQWLEGAGTLVLQEGTAKVSWAD    |
|         | : : *:** :* : :    | **.*:**: * : * :. .: :             |

2

3

1 **Supplementary Table 3** Conditions for the quantitation of LCMs by UPLC-MS/MS

| LCM                                               | transition            | collision energy [eV] | external standard                                  | lower limit of quantitation [nM] <sup>a</sup> |
|---------------------------------------------------|-----------------------|-----------------------|----------------------------------------------------|-----------------------------------------------|
| $\alpha$ -T-3'-COOH ( <b>6a</b> )                 | 277 $\rightarrow$ 233 | -25                   | $\alpha$ -T-3'-COOH ( <b>6a</b> )                  | 2                                             |
| $\alpha$ -T-5'-COOH ( <b>5a</b> )                 | 319 $\rightarrow$ 150 | -24                   | $\alpha$ -T-13'-COOH ( <b>4a</b> )                 | /                                             |
| $\alpha$ -T-7'-COOH ( <b>13a</b> )                | 347 $\rightarrow$ 163 | -24                   | $\alpha$ -T-13'-COOH ( <b>4a</b> )                 | /                                             |
| $\alpha$ -T-9'-COOH ( <b>12a</b> )                | 389 $\rightarrow$ 163 | -46                   | $\alpha$ -T-13'-COOH ( <b>4a</b> )                 | /                                             |
| $\alpha$ -T-11'-COOH ( <b>11a</b> )               | 417 $\rightarrow$ 163 | -46                   | $\alpha$ -T-13'-COOH ( <b>4a</b> )                 | /                                             |
| $\alpha$ -T-13'-COOH ( <b>4a</b> )                | 459 $\rightarrow$ 163 | -46                   | $\alpha$ -T-13'-COOH ( <b>4a</b> )                 | 1                                             |
|                                                   | 459 $\rightarrow$ 150 | -43                   |                                                    |                                               |
|                                                   | 459 $\rightarrow$ 295 | -40                   |                                                    |                                               |
| $\alpha$ -T-13'-CH <sub>2</sub> OH ( <b>2a</b> )  | 445 $\rightarrow$ 163 | -40                   | $\alpha$ -T-13'-CH <sub>2</sub> OH ( <b>2a</b> )   | 250                                           |
| $\gamma$ -T-3'-COOH ( <b>6c</b> )                 | 263 $\rightarrow$ 219 | -25                   | $\gamma$ -T-3'-COOH ( <b>6c</b> )                  | 1                                             |
| $\gamma$ -T-13'-COOH ( <b>4c</b> )                | 445 $\rightarrow$ 149 | -46                   | $\alpha$ -T-13'-COOH ( <b>4a</b> )                 | /                                             |
| $\gamma$ -T-13'-CH <sub>2</sub> OH ( <b>2c</b> )  | 431 $\rightarrow$ 149 | -40                   | $\alpha$ -T-13'-CH <sub>2</sub> OH ( <b>2a</b> )   | /                                             |
| $\gamma$ -TE-13'-COOH ( <b>4g</b> )               | 439 $\rightarrow$ 149 | -40                   | $\gamma$ -TE-13'-COOH ( <b>4g</b> )                | 0.5                                           |
| $\gamma$ -DE-13'-COOH ( <b>4k</b> )               | 441 $\rightarrow$ 149 | -40                   | $\gamma$ -TE-13'-COOH ( <b>4g</b> )                | /                                             |
| $\gamma$ -TE-13'-CH <sub>2</sub> OH ( <b>2g</b> ) | 425 $\rightarrow$ 149 | -30                   | $\gamma$ -TE-12a'-CH <sub>2</sub> OH ( <b>3g</b> ) | 4                                             |
| $\delta$ -T-3'-COOH ( <b>6d</b> )                 | 249 $\rightarrow$ 205 | -25                   | $\delta$ -T-3'-COOH ( <b>6d</b> )                  | 2                                             |
| $\delta$ -T-13'-COOH ( <b>4d</b> )                | 431 $\rightarrow$ 135 | -46                   | $\delta$ -T-13'-COOH ( <b>4d</b> )                 | 4                                             |
| $\delta$ -TE-13'-COOH ( <b>4h</b> )               | 425 $\rightarrow$ 135 | -40                   | $\delta$ -TE-13'-COOH ( <b>4h</b> )                | 1                                             |
| $\delta$ -DE-13'-COOH( <b>4l</b> )                | 427 $\rightarrow$ 135 | -40                   | $\delta$ -TE-13'-COOH ( <b>4h</b> )                | /                                             |
| $\delta$ -T-13'-CH <sub>2</sub> OH ( <b>2d</b> )  | 417 $\rightarrow$ 135 | -46                   | $\delta$ -T-13'-CH <sub>2</sub> OH ( <b>2d</b> )   | 60                                            |
| $\delta$ -TE-13'-CH <sub>2</sub> OH ( <b>2h</b> ) | 411 $\rightarrow$ 135 | -30                   | $\delta$ -TE-13'-CH <sub>2</sub> OH ( <b>2h</b> )  | 16                                            |

2  
3  
4  
5  
6  
7

<sup>a</sup> signal-to-noise ratio  $\geq 3$

1 **Supplementary Table 4** Plasma and exudate levels of vitamin E metabolites in mouse  
 2 peritonitis

3

| treatment<br>(p.o.)                   | dose<br>[mg/kg] | $\alpha$ -T ( <b>1a</b> ) metabolites [nM] |                 |          |               |         |               |         |         |
|---------------------------------------|-----------------|--------------------------------------------|-----------------|----------|---------------|---------|---------------|---------|---------|
|                                       |                 | 13'-COOH                                   |                 | 11'-COOH |               | 9'-COOH |               | 7'-COOH |         |
|                                       |                 | plasma                                     | exudate         | plasma   | exudate       | plasma  | exudate       | plasma  | exudate |
| w/o                                   | /               | 17.4±3.7                                   | 146.3±18.8      | 0.3±0.1  | 1.1±0.1       | 0.2±0.1 | 0.3±0.1       | n.d.    | n.d.    |
| $\alpha$ -T ( <b>1a</b> )             | 50              | 20.8±3.3                                   | 233.1±21.5<br>* | 0.9±0.3  | 4.0±0.5<br>** | 0.5±0.2 | 0.7±0.2<br>*  | 0.0±0.0 | 0.1±0.0 |
| $\alpha$ -T ( <b>1a</b> )/<br>sesamin | 50/250          | 12.0±1.6                                   | 210.9±33.9      | 0.0±0.0  | 0.0±0.0       | 0.0±0.0 | 0.0±0.0       | n.d.    | n.d.    |
| sesamin                               | 250             | 15.6±3.1                                   | 160.1±39.7      | 0.4±0.0  | 1.4±0.3       | 0.6±0.2 | 7.6±1.7       | n.d.    | n.d.    |
| zileuton                              | 30              | 7.1±1.2                                    | 108.8±27.4      | 0.4±0.1  | 1.7±0.3       | 1.0±0.1 | 14.1±3.6<br>* | n.d.    | n.d.    |

4 Concentrations of  $\alpha$ -T metabolites (nM) are given as mean  $\pm$  s.e.m.; n = 6 mice/group. \* $P$  <  
 5 0.05, \*\* $P$  < 0.01 vs. vehicle control; one-way ANOVA + Tukey HSD *post hoc* tests.

6

7

8

9

1 **Supplementary Table 5** Sequence of wildtype 5-LO and its site-directed mutants in the  
 2 expression vectors 5-LO\_wt, 5-LO\_3W and 5-LO\_Arg101Asp

|    |                                                              |     |           |
|----|--------------------------------------------------------------|-----|-----------|
| 3  |                                                              |     |           |
| 4  | 1                                                            | W13 | 60        |
| 5  | ATGCCCTCCTACACGGTCACCGTGGCCACTGGCAGCCAGTGGTTCGCCGGCACTGACGAC |     | wt        |
| 6  | ATGCCCTCCTACACGGTCACCGTGGCCACTGGCAGCCAGTGGTTCGCCGGCACTGACGAC |     | Arg101Asp |
| 7  | ATGCCCTCCTACACGGTCACCGTGGCCACTGGCAGCCAGGCGTTCGCCGGCACTGACGAC |     | 3W        |
| 8  |                                                              |     |           |
| 9  | 181                                                          | W75 | 240       |
| 10 | GAACTGGGCGAGATCCAGCTGGTCAGAATCGAGAAGCGCAAGTACTGGCTGAATGACGAC |     | wt        |
| 11 | GAACTGGGCGAGATCCAGCTGGTCAGAATCGAGAAGCGCAAGTACTGGCTGAATGACGAC |     | Arg101Asp |
| 12 | GAACTGGGCGAGATCCAGCTGGTCAGAATCGAGAAGCGCAAGTACGCGCTGAATGACGAC |     | 3W        |
| 13 |                                                              |     |           |
| 14 | 241                                                          |     | 300       |
| 15 | TGGTACCTGAAGTACATCACGCTGAAGACGCCCCACGGGGACTACATCGAGTTCCCCTGC |     | wt        |
| 16 | TGGTACCTGAAGTACATCACGCTGAAGACGCCCCACGGGGACTACATCGAGTTCCCCTGC |     | Arg101Asp |
| 17 | TGGTACCTGAAGTACATCACGCTGAAGACGCCCCACGGGGACTACATCGAGTTCCCCTGC |     | 3W        |
| 18 |                                                              |     |           |
| 19 | 301 R101 W102                                                |     |           |
| 20 | TACCGC TGGATCACCGGCGAT                                       |     | wt        |
| 21 | TACGAC TGGATCACCGGCGAT                                       |     | Arg101Asp |
| 22 | TACCGC GCGATCACCGGCGAT                                       |     | 3W        |
| 23 |                                                              |     |           |

1 **Supplementary Table 6** List of primer sequences

2

| name                               | sequence                  |
|------------------------------------|---------------------------|
| reverse primer for 5-LO sequencing | 5'-GTTTTTGCCGTGTTCCAGT-3' |

3



1 **Supplementary Notes**

2

3 **Supplementary Note 1**

4

5

**General Experimental Procedures**

6 All solvents were dried and distilled before use. Reactions were run under inert nitrogen  
7 atmosphere. Unless otherwise stated, materials obtained from commercial suppliers were used  
8 without further purification. <sup>1</sup>H-NMR and <sup>13</sup>C-NMR were recorded on a JEOL JNM-ECZS400  
9 spectrometer in deuterated chloroform and calibrated using the solvent resonance as internal  
10 reference. Chemical shifts  $\delta$  are given in ppm, and coupling constants J are given in Hz.  
11 Complete <sup>1</sup>H NMR assignments have been determined through 1D and 2D (HMQC, HMBC,  
12 NOESY) NMR experiments. IR spectra were recorded on a Thermo Scientific Nicolet iS5 FT-  
13 IR Spectrometer and are reported in terms of frequency of absorption (cm<sup>-1</sup>). Mass  
14 spectrometric analyses were performed on a JMS-700 (JEOL LTD) double focusing mass  
15 spectrometer with reversed geometry, equipped with a FAB source. Column chromatography  
16 was performed using silica gel 60A (particle size 40-63  $\mu$ m) purchased from Fisher Scientific.  
17 Flash chromatography purifications using pre-packed columns (silica or octadecylsilyl silica,  
18 4 g to 330 g) were realized on a CombiFlash Rf-200 equipped with a gradient pump, a column  
19 station with a DASi introduction system, a multi-wavelength UV detector, a fraction collector  
20 and a software to control the device. HPLC-DAD analyses were performed with a Waters  
21 Alliance HPLC system (Milford, CT, USA) equipped with a quaternary HPLC pump, degasser,  
22 autosampler, and PDA detector (Milford, CT, USA). HPLC-ELSD analyses were performed  
23 with a LC-2030 3D Prominence-i system (Shimadzu, Kyoto, Japan) equipped with a quaternary  
24 low-pressure gradient solvent delivery LC-2030 pump with a high-pressure switching valves,  
25 a LC-2030 vacuum degasser, both a ELSD-LT90 detector and a high sensitivity LC- 2030 PDA  
26 detector, a LC-2030 auto sampler and a LC-2030 column oven. Reactions under microwave  
27 irradiation were performed in the Monowave 300 (Anton Paar), equipped with the MAS 24  
28 Autosampler, using borosilicate glass vials with snap caps. Purity of the original semisynthetic  
29 compounds described in this section has been determined using HPLC-ELSD analyses.

30

31

32

## Semi-synthesis of $\alpha$ -TE-13'-CH<sub>2</sub>OH (**2e**)

The multi-step strategy for the semi-synthesis of  $\alpha$ -TE-13'-CH<sub>2</sub>OH (**2e**) is shown in **Supplementary Fig. 9**.

### Step 1:

5,7-bis(dimethylaminomethyl)- $\delta$ -garcinoic acid: *N,N,N',N'*-tetramethyldiaminomethane TMDA (2.6 ml, 18.8 mmol, 20 equiv.) and paraformaldehyde (563 mg, 18.8 mmol, 20 equiv.) were added to a solution of  $\delta$ -TE-13'-COOH ( $\delta$ -garcinoic acid, **4h**; 1.4 g, 0.94 mmol, 1 equiv.) in 1,4-dioxane (12 ml). The reaction mixture was heated at 140°C under microwave irradiation for 40 min before quenching the reaction with water. The resulting mixture was extracted three times with dichloromethane (DCM) and the combined organic layers were washed with brine, dried over anhydrous Na<sub>2</sub>SO<sub>4</sub>, filtered and concentrated under reduced pressure. The brown oily crude product is used without further purification.

<sup>1</sup>H NMR (400 MHz, CDCl<sub>3</sub>): 6.35 (t, J = 7.2 Hz, 1H), 5.07 (t, J = 7.2 Hz, 1H), 5.05 (t, J = 7.2 Hz, 1H), 3.96 (s, 2H), 3.86 (s, 2H), 2.61 (m, 2H), 2.54 (s, 6H), 2.48 (s, 6H), 2.25-1.91 (m, 10H), 2.16 (s, 3H), 2.10 (s, 3H), 1.82-1.63 (m, 2H), 1.70 (s, 3H), 1.56-1.42 (m, 2H), 1.52 (s, 3H), 1.49 (s, 3H), 1.22 (s, 3H); <sup>13</sup>C NMR (100 MHz, CDCl<sub>3</sub>): 177.7, 151.7, 145.8, 137.2, 133.8, 136.3, 134.3, 125.8, 125.6, 124.6, 122.0, 118.4, 116.2, 75.8, 56.9, 56.5, 44.0, 43.9, 40.7, 40.2, 39.9, 32.4, 28.4, 27.4, 24.3, 23.3, 21.2, 16.3, 16.0, 13.9, 12.1; HRMS (FAB): (m/z) calcd. for C<sub>33</sub>H<sub>52</sub>N<sub>2</sub>O<sub>4</sub> [M + H]<sup>+</sup> 541.4000, found 541.3997.

### Step 2:

$\alpha$ -TE-13'-COOH ( $\alpha$ -garcinoic acid, **4e**): NaBH<sub>3</sub>CN (1.1 g, 17.2 mmol, 20 equiv.) was added to a solution of 5,7-bis(dimethylaminomethyl)- $\delta$ -garcinoic acid (466 mg, 0.86 mmol, 1 equiv.) in ethanol (14 ml). The reaction mixture was heated at 145°C under microwave irradiation for 30 min. Then the reaction was quenched with a 10% aqueous HCl solution (10 ml). The resulting mixture was extracted three times with diethyl ether (Et<sub>2</sub>O; 20 ml) and the combined organic layers were successively washed with water, brine, dried over anhydrous Na<sub>2</sub>SO<sub>4</sub>, filtered and concentrated under reduced pressure. The residue was purified via column chromatography on silica gel eluted with a petroleum ether (PE)/acetone/DCM mixture (8:1:1) as a mobile phase to afford  $\alpha$ -TE-13'-COOH ( $\alpha$ -garcinoic acid, **4e**) (343 mg, 0.75 mmol, 80% over two steps from  $\delta$ -garcinoic acid,  $\delta$ -TE-13'-COOH, **4h**) as a pale oil.

<sup>1</sup>H NMR ( $\delta$  ppm): 6.88 (t, J = 6.8 Hz, 1H), 5.13 (t, J = 3.8 Hz, 2H), 2.61 (t, J = 6.8 Hz, 2H), 2.31-2.25 (m, 2H), 2.16 (s, 3H), 2.15-2.04 (m, 6H), 2.12 (s, 3H), 2.11 (s, 3H), 1.99-1.96 (m,

1 2H), 1.85-1.75 (m, 2H), 1.82 (s, 3H), 1.67-1.42 (m, 2H), 1.60 (s, 6H), 1.25 (s, 3H); <sup>13</sup>C NMR  
2 (δ ppm): 173.2, 146.6, 145.1, 144.7, 136.0, 133.8, 127.0, 125.3, 124.7, 122.8, 121.2, 118.6,  
3 117.4, 74.4, 39.7, 39.6, 38.2, 31.7, 27.7, 26.7, 23.8, 22.3, 20.9, 16.1, 16.0, 12.4, 12.1, 11.9,  
4 11.4; HRMS (FAB): (m/z) calcd. for C<sub>29</sub>H<sub>42</sub>O<sub>4</sub> [M]<sup>+</sup> 454.3078, found 454.3084.

5

6 Step 3:

7 α-TE-13'-CH<sub>2</sub>OH (α-deoxyamplexichromanol, **2e**): A solution of α-TE-13'-COOH (α-  
8 garcinoic acid, **4e**; 71 mg, 0.38 mmol, 1 equiv.) in tetrahydrofuran (9 ml) was added to a  
9 solution of LiAlH<sub>4</sub> (29 mg, 0.76 mmol, 2 equiv.) in tetrahydrofuran (9 ml) at 0°C. The reaction  
10 mixture was stirred at room temperature for 2 h. Then it was quenched with two drops of a  
11 solution of NaOH (1M) prior to H<sub>2</sub>O addition (5 ml). The resulting mixture was stirred for 15  
12 min, and extracted three times with Et<sub>2</sub>O (10 ml). The combined organic layers were washed  
13 with a saturated aqueous solution of Rochelle's salt (20 ml), dried over anhydrous Na<sub>2</sub>SO<sub>4</sub>,  
14 filtered and concentrated under reduced pressure. The residue was purified via column  
15 chromatography on silica gel eluted with a PE/acetone mixture (9:1) to afford α-TE-13'-  
16 CH<sub>2</sub>OH (α-deoxyamplexichromanol, **2e**) (65 mg, 0.15 mmol, 39% yield) as an orange oil.

17 Purity (HPLC-ELSD): 99%. TLC (petroleum ether:acetone, 80:20 v/v): R<sub>f</sub> = 0.39; <sup>1</sup>H NMR  
18 (400 MHz, CDCl<sub>3</sub>): 5.38 (ddq, J = 1.3 Hz, 5.6 Hz, 8.3 Hz, 1H), 5.12 (m, 2H), 3.99 (s, 2H),  
19 2.61 (t, J = 6.9 Hz, 2H), 2.18-2.04 (m, 6H), 2.16 (s, 3H), 2.12 (s, 3H), 2.11 (s, 3H), 2.08 (s,  
20 3H), 2.01-1.95 (m, 4H), 1.85-1.75 (m, 2H), 1.66 (s, 3H), 1.65-1.51 (m, 2H), 1.59 (s, 6H), 1.25  
21 (s, 3H); <sup>13</sup>C NMR (100 MHz, CDCl<sub>3</sub>): 145.6, 144.7, 135.1, 134.8, 134.7, 126.3, 124.6 (2C),  
22 122.8, 121.2, 118.6, 117.4, 74.4, 69.2, 39.8, 39.6, 39.4, 31.7, 26.7, 26.4, 23.9, 22.4, 20.9, 16.1,  
23 16.0, 13.8, 12.4, 11.9, 11.1; IR (ATR): 3376, 2921, 1450, 1377, 1253, 1164, 1085, 856 cm<sup>-1</sup>;  
24 HRMS (FAB): (m/z) calcd. for C<sub>29</sub>H<sub>44</sub>O<sub>3</sub> [M]<sup>+</sup> 440.3285, found 440.3295.

25

### 26 Semi-synthesis of β-TE-13'-CH<sub>2</sub>OH (**2f**)

27

28 The multi-step strategy for the semi-synthesis of β-TE-13'-CH<sub>2</sub>OH (**2f**) is shown in  
29 **Supplementary Fig. 10**.

30

31 *Step 1:*

32 *Methyl-δ-garcinoate*: NaHCO<sub>3</sub> (434 mg, 5.16 mmol, 4 equiv.) and iodomethane (321 μl, 5.16  
33 mmol, 4 equiv.) were added to a solution of δ-garcinoic acid (550 mg, 1.29 mmol, 1 equiv.) in  
34 DMF (10 ml). The reaction mixture was heated at 120°C under microwave irradiation for 45

1 minutes. Then the reaction was quenched with water. The resulting mixture was extracted with  
2 Et<sub>2</sub>O (three times 20 ml) and the combined organic layers were washed with water (150 ml)  
3 and brine (50 ml), dried over anhydrous Na<sub>2</sub>SO<sub>4</sub>, filtered and concentrated under reduced  
4 pressure. The residue was purified by silica gel column chromatography eluted with PE/acetone  
5 (9:1) to afford methyl δ-garcinoate (542 mg, 1.23 mmol, 95% yield) as a yellow oil.  
6 <sup>1</sup>H NMR (400 MHz, CDCl<sub>3</sub>): 6.75 (td, J = 1.4 Hz, 7.3 Hz, 1H), 6.49 (d, J = 2.9 Hz, 1H), 6.39  
7 (d, J = 2.9 Hz, 1H), 5.14-5.10 (m, 2H), 4.84 (s, OH), 3.74 (s, 3H), 2.69 (t, J = 6.9 Hz, 2H), 2.25  
8 (dd, J = 7.5 Hz, 15.1 Hz, 2H), 2.12 (s, 3H), 2.10-2.04 (m, 6H), 1.98-1.95 (m, 2H), 1.83 (d, J =  
9 1.3 Hz, 3H), 1.81-1.71 (m, 2H), 1.67-1.49 (m, 8H), 1.26 (s, 3H); <sup>13</sup>C NMR (100 MHz, CDCl<sub>3</sub>):  
10 169.0, 148.0, 146.0, 142.7, 135.0, 134.0, 127.4 (2), 125.1, 124.6, 121.3, 115.8, 112.7, 75.4,  
11 51.9, 39.7, 39.6, 38.3, 31.5, 27.5, 26.6, 24.2, 22.6, 22.3, 16.2, 16.1, 16.0, 12.5; HRMS (FAB):  
12 (m/z) calcd for C<sub>28</sub>H<sub>40</sub>O<sub>4</sub> [M]<sup>+</sup> 440.2921, found 440.2924.

13

14 Step 2:

15 Methyl 5-dimethylaminomethyl-δ-garcinoate: TMDA (184 μl, 1.35 mmol, 3 equiv.) and  
16 paraformaldehyde (41 mg, 1.35 mmol, 3 equiv.) were added to a 6 ml ethanol solution of δ-  
17 methyl garcinoate (200 mg, 0.45 mmol, 1 equiv.). The reaction mixture was heated at 120°C  
18 under microwave irradiation for 60 min and then the reaction was quenched with water (10  
19 ml). The resulting mixture was extracted three times with DCM (20 ml) and the combined  
20 organic layers were washed with brine (40 ml), dried over anhydrous Na<sub>2</sub>SO<sub>4</sub>, filtered and  
21 concentrated under reduced pressure. The brown oily crude product (199 mg) is used without  
22 further purification.

23 <sup>1</sup>H NMR (400 MHz, CDCl<sub>3</sub>): 6.74 (tq, J = 1.4 Hz, 7.3 Hz, 1H), 6.52 (s, 1H), 5.12 (t, J = 6.3  
24 Hz, 2H), 3.72 (s, 3H), 3.57 (s, 2H), 2.59 (t, J = 6.9 Hz, 2H), 2.30 (s, 6H), 2.26-2.22 (m, 2H),  
25 2.12 (s, 3H), 2.09-2.05 (m, 6H), 1.98-1.96 (m, 2H), 1.83 (s, 3H), 1.80-1.73 (m, 2H), 1.65-1.52  
26 (m, 2H), 1.59 (s, 3H), 1.58 (s, 3H), 1.23 (s, 3H); <sup>13</sup>C NMR (100 MHz, CDCl<sub>3</sub>): 168.9, 150.6,  
27 144.7, 142.5, 135.2, 134.0, 127.5, 126.7, 125.2, 124.5, 118.5, 116.7, 116.4, 74.2, 57.8, 51.8,  
28 44.6 (2C), 39.7, 39.6, 38.3, 31.6, 27.5, 26.7, 23.8, 22.3, 20.6, 16.3, 16.1, 16.0, 12.5; HRMS  
29 (FAB): (m/z) calcd for C<sub>31</sub>H<sub>47</sub>NO<sub>4</sub> [M]<sup>+</sup> 497.3500, found 497.3502.

30

31 Step 3:

32 Methyl β-garcinoate: NaBH<sub>3</sub>CN (75 mg, 1.2 mmol, 3 equiv.) was added to a solution of methyl  
33 5-dimethylaminomethyl-δ-garcinoate (199 mg, 0.4 mmol, 1 equiv.) in ethanol (6 ml). The  
34 reaction mixture was heated at 120°C under microwave irradiation for 45 min. Then the

1 reaction was quenched with 10% aqueous HCl solution (5 ml). The resulting mixture was  
2 extracted three times with Et<sub>2</sub>O (10 ml) and the combined organic layers were washed with  
3 water (30 ml), brine (30 ml), dried over anhydrous Na<sub>2</sub>SO<sub>4</sub>, filtered and concentrated under  
4 reduced pressure. The brown oily crude product is used without further purification.

5 <sup>1</sup>H NMR (400 MHz, CDCl<sub>3</sub>): 6.75 (tq, J = 1.3 Hz, 7.3 Hz, 1H), 6.49 (s, 1H), 5.13 (t, J = 7.4  
6 Hz, 2H), 4.74 (br, OH), 3.74 (s, 3H), 2.61 (t, J = 6.8 Hz, 2H), 2.26 (dd, J = 7.5 Hz, 15.1 Hz,  
7 2H), 2.15-2.05 (m, 6H), 2.11 (s, 3H), 2.09 (s, 3H), 1.99-1.95 (m, 2H), 1.87-1.76 (m, 2H), 1.84  
8 (s, 3H), 1.67-1.51 (m, 2H), 1.60 (s, 6H), 1.26 (s, 3H); <sup>13</sup>C NMR (100 MHz, CDCl<sub>3</sub>): 169.0,  
9 146.0, 145.9, 142.6, 135.0, 133.9, 127.5, 125.2, 124.6, 124.0, 120.4, 119.4, 115.5, 74.3, 51.9,  
10 39.7, 39.4, 38.3, 31.6, 27.5, 26.6, 23.9, 22.3, 20.9, 16.1, 16.0, 16.0, 12.5, 11.1; HRMS (FAB):  
11 (m/z) calcd for C<sub>29</sub>H<sub>42</sub>O<sub>4</sub> [M]<sup>+</sup> 454.3078, found 454.3080.

12

13 Step 4:

14 β-TE-13'-CH<sub>2</sub>OH (β-deoxyamplexichromanol, **2f**): A solution of methyl β-garcinoate (182  
15 mg, 0.40 mmol, 1 equiv.) in tetrahydrofuran (10 ml) was added to a solution of LiAlH<sub>4</sub> (31 mg,  
16 0.80 mmol, 2 equiv.) in tetrahydrofuran (10 ml) at 0°C. After stirring 1.5 h at room temperature,  
17 the reaction was quenched with two drops of an aqueous solution of NaOH (1M) then H<sub>2</sub>O (5  
18 ml). The resulting mixture was stirred for 15 min, extracted three times with Et<sub>2</sub>O (10 ml). The  
19 combined organic layers were washed with saturated aqueous solution of Rochelle's salt, dried  
20 over anhydrous Na<sub>2</sub>SO<sub>4</sub>, filtered and concentrated under reduced pressure. The residue was  
21 purified via column chromatography on silica gel eluted with a PE/acetone mixture (9:1) to  
22 afford β-TE-13'-CH<sub>2</sub>OH (β-deoxyamplexichromanol, **2f**) (54 mg, 0.13 mmol, 29% yield from  
23 methyl δ-garcinoate) as a yellow oil.

24 Purity (HPLC-ELSD): 99%; TLC (petroleum ether:acetone, 80:20 v/v): R<sub>f</sub> = 0.32; <sup>1</sup>H NMR  
25 (400 MHz, CDCl<sub>3</sub>): 6.48 (s, 1H), 5.38 (ddq, J = 1.3 Hz, 5.6 Hz, 8.3 Hz, 1H), 5.11 (dd, J = 7.1  
26 Hz, 16.1 Hz, 2H), 3.99 (s, 2H), 2.61 (t, J = 6.9 Hz, 2H), 2.14-2.05 (m, 6H), 2.11 (s, 3H), 2.08  
27 (s, 3H), 1.98-1.95 (m, 4H), 1.87-1.74 (m, 2H), 1.66 (s, 3H), 1.63-1.50 (m, 2H), 1.59 (s, 6H),  
28 1.25 (s, 3H); <sup>13</sup>C NMR (100 MHz, CDCl<sub>3</sub>): 146.0, 145.9, 135.1, 134.8, 134.7, 126.4, 124.6,  
29 124.3, 124.1, 120.4, 119.4, 115.4, 74.4, 69.2, 39.8, 39.4, 39.3, 31.6, 26.7, 26.4, 24.0, 22.3, 20.9,  
30 16.7, 16.1, 16.0, 13.8, 11.1; IR (ATR): 3357, 2970, 2922, 1458, 1230, 1164, 1098, 1004 cm<sup>-1</sup>;  
31 HRMS (FAB): (m/z) calcd for C<sub>28</sub>H<sub>42</sub>O<sub>3</sub> [M]<sup>+</sup> 426.3128, found 426.3131.

32

33

#### Semi-synthesis of δ-DE-13'-COOH (**4l**):

34



1 The semi-synthesis of methyl 19,20-dihydro- $\delta$ -garcinoate is shown in **Supplementary Fig. 11**,  
2 and the subsequent semi-synthesis of  $\delta$ -DE-13'-COOH (**4I**) is shown in **Supplementary Fig.**  
3 **12**.

4  
5 Methyl 19,20-dihydro- $\delta$ -garcinoate: Magnesium shavings (156 mg, 6.4 mmol) were added to  
6 a solution of methyl  $\delta$ -garcinoate (140 mg, 0.32 mmol) in distilled methanol (14 ml). The  
7 reaction mixture was stirred at room temperature for 24 h and then the reaction was quenched  
8 with water (5 ml). The resulting mixture was extracted with Et<sub>2</sub>O (three times 10 ml) and the  
9 combined organic layers were washed with water (10 ml) and brine (10 ml), dried over  
10 anhydrous Na<sub>2</sub>SO<sub>4</sub>, filtered and concentrated under reduced pressure. The brown oily crude  
11 product was used for next step without further purification.

12 <sup>1</sup>H NMR (400 MHz, CDCl<sub>3</sub>): 6.48 (d, J = 3.0 Hz, 1H), 6.39 (d, J = 3.0 Hz, 1H), 5.10 (dt, J =  
13 6.6 Hz, 10.3 Hz, 2H), 3.67 (s, 3H), 2.69 (t, J = 6.9 Hz, 2H), 2.44 (dd, J = 7.0 Hz, 13.0 Hz, 1H),  
14 2.12 (s, 3H), 2.09-2.02 (m, 4H), 1.98-1.92 (m, 4H), 1.82-1.69 (m, 2H), 1.67-1.49 (m, 4H), 1.58  
15 (s, 3H), 1.55 (s, 3H), 1.39-1.33 (m, 2H), 1.26 (s, 3H), 1.14 (d, J = 7.0 Hz, 3H); <sup>13</sup>C NMR (100  
16 MHz, CDCl<sub>3</sub>): 177.7, 148.0, 146.0, 135.2, 134.8, 127.4, 124.6, 124.4, 121.3, 115.8, 112.7, 75.4,  
17 51.7, 39.8, 39.6, 39.5 (2C), 33.4, 31.5, 26.6, 25.6, 24.2, 22.6, 22.3, 17.2, 16.2, 16.0, 15.9;  
18 HRMS (FAB): (m/z) calcd for C<sub>28</sub>H<sub>42</sub>O<sub>4</sub> [M]<sup>+</sup> 442.3078, found 442.3078.

19  
20  $\delta$ -DE-13'-COOH (**4I**): 4 ml of a 2 M sodium hydroxide methanol solution were added to a  
21 solution of methyl 19,20-dihydro- $\delta$ -garcinoate (100 mg, 0.23 mmol) in methanol. The reaction  
22 mixture was heated at 70°C for 4 h and then the reaction was quenched with 10 ml of a 10%  
23 HCl aqueous solution. The resulting mixture was extracted with Et<sub>2</sub>O (three times 10 ml) and  
24 the combined organic layers were washed with water (15 ml) and brine (15 ml), dried over  
25 anhydrous Na<sub>2</sub>SO<sub>4</sub>, filtered and concentrated under reduced pressure. The residue was purified  
26 by column chromatography eluted with PE/acetone (9:1) to afford  $\delta$ -DE-13'-COOH (**4I**, 94  
27 mg, 96%) as an orange oil.

28 Purity (HPLC-ELSD): 99%; TLC (petroleum ether:acetone:CH<sub>2</sub>Cl<sub>2</sub>, 70:20:10 v/v): R<sub>f</sub> = 0.23;  
29 <sup>1</sup>H NMR (400 MHz, CDCl<sub>3</sub>): 6.48 (d, J = 3 Hz, 1H), 6.38 (d, J = 3 Hz, 1H), 5.14-5.07 (t, 2H),  
30 2.67-2.71 (t, J = 6.8 Hz, 2H), 2.49-2.44 (q, 1H), 2.13 (s, 3H), 2.09-2.03 (m, 6H), 1.98-1.94 (m,  
31 2H), 1.82-1.72 (m, 2H), 1.58 (s, 3H), 1.56 (s, 3H), 1.67-1.49 (m, 2H), 1.45-1.36 (m, 4H), 1.26  
32 (s, 3H), 1.18-1.16 (d, J = 6.9 Hz, 3H); <sup>13</sup>C NMR (100 MHz, CDCl<sub>3</sub>): 181.9, 147.8, 146.1, 135.2,  
33 134.7, 127.5, 124.7, 124.5, 121.4, 115.8, 112.7, 75.5, 39.8, 39.7, 39.5, 39.2, 33.2, 31.5, 26.6,

1 25.5, 24.2, 22.6, 22.3, 17.0, 16.2, 16.0, 15.9; IR (ATR): 2927, 1703, 1609, 1465, 1378, 1219,  
2 1097, 853  $\text{cm}^{-1}$ ; HRMS (FAB): (m/z) calcd for  $\text{C}_{27}\text{H}_{40}\text{O}_4$   $[\text{M}]^+$  428.2921, found 428.2930.

### 4 **Semi-synthesis of $\delta$ -TE-13'-CONHBz (7)**

6 The semi-synthesis of  $\delta$ -TE-13'-CONHBz (7) is shown in **Supplementary Fig. 13**.

8 Benzylamine (57  $\mu\text{l}$ , 0.53 mmol, 1.5 equiv.), diisopropylethylamine (183  $\mu\text{l}$ , 1.05 mmol, 3  
9 equiv.) and HBTU as a coupling agent (201 mg, 0.53 mmol, 1.5 equiv.) were added to a  
10 solution of  $\delta$ -garcinoic acid (150 mg, 0.35 mmol, 1 eq) in 4 ml of dry DMF. The reaction  
11 mixture was stirred at room temperature for 18 h then the reaction was quenched with water (5  
12 ml). The resulting mixture was extracted with  $\text{Et}_2\text{O}$  (three times 10 ml) and the combined  
13 organic layers were successively washed with water (15 ml) and brine (15 ml), dried over  
14 anhydrous  $\text{Na}_2\text{SO}_4$ , filtered and concentrated under reduced pressure. The crude residue was  
15 purified by column chromatography eluted with PE/acetone (9:1) to afford the benzylamide  
16 (160 mg, 0.31 mmol, 88% yield) as an oil.

17 Purity (HPLC-ELSD): 99%; TLC (petroleum ether:acetone: $\text{CH}_2\text{Cl}_2$ , 70:20:10 v/v):  $R_f$  = 0.50;  
18  $^1\text{H}$  NMR (400 MHz,  $\text{CDCl}_3$ ): 7.36-7.28 (m, 5H), 6.48 (d,  $J$  = 2.7 Hz, 1H), 6.38 (d,  $J$  = 2.7 Hz,  
19 1H), 6.35 (t,  $J$  = 7.2 Hz 1H), 6.02 (br, 1H), 5.08 (dd,  $J$  = 6.2 Hz, 12.8 Hz, 2H), 4.51 (d,  $J$  = 5.6  
20 Hz, 2H), 2.67 (t,  $J$  = 6.8 Hz, 2H), 2.19 (dd,  $J$  = 7.4 Hz, 15.0 Hz, 2H), 2.11 (s, 3H); 2.08-2.00  
21 (m, 6H), 1.98-1.93 (m, 2H), 1.84 (s, 3H), 1.81-1.69 (m, 2H), 1.65-1.50 (m, 2H), 1.57 (s, 6H),  
22 1.27 (s, 3H);  $^{13}\text{C}$  NMR (100 MHz,  $\text{CDCl}_3$ ): 169.7, 148.3, 145.8, 138.8, 138.4, 136.8, 134.2,  
23 130.5, 128.9 (2C), 128.0 (2C), 127.7, 127.3, 125.0, 124.8, 121.2, 115.9, 112.8, 75.3, 44.0,  
24 39.6, 39.1, 38.5, 31.5, 27.2, 26.4, 24.5, 22.6, 22.3, 16.2, 16.1, 15.9, 12.9; IR (ATR): 3328,  
25 2924, 1659, 1617, 1528, 1469, 1219, 933  $\text{cm}^{-1}$ ; HRMS (FAB): (m/z) calcd for  $\text{C}_{34}\text{H}_{45}\text{NO}_3$   
26  $[\text{M}]^+$  515.3394, found 515.3387.

27

1  
2

# $^1\text{H}$ and $^{13}\text{C}$ NMR spectra

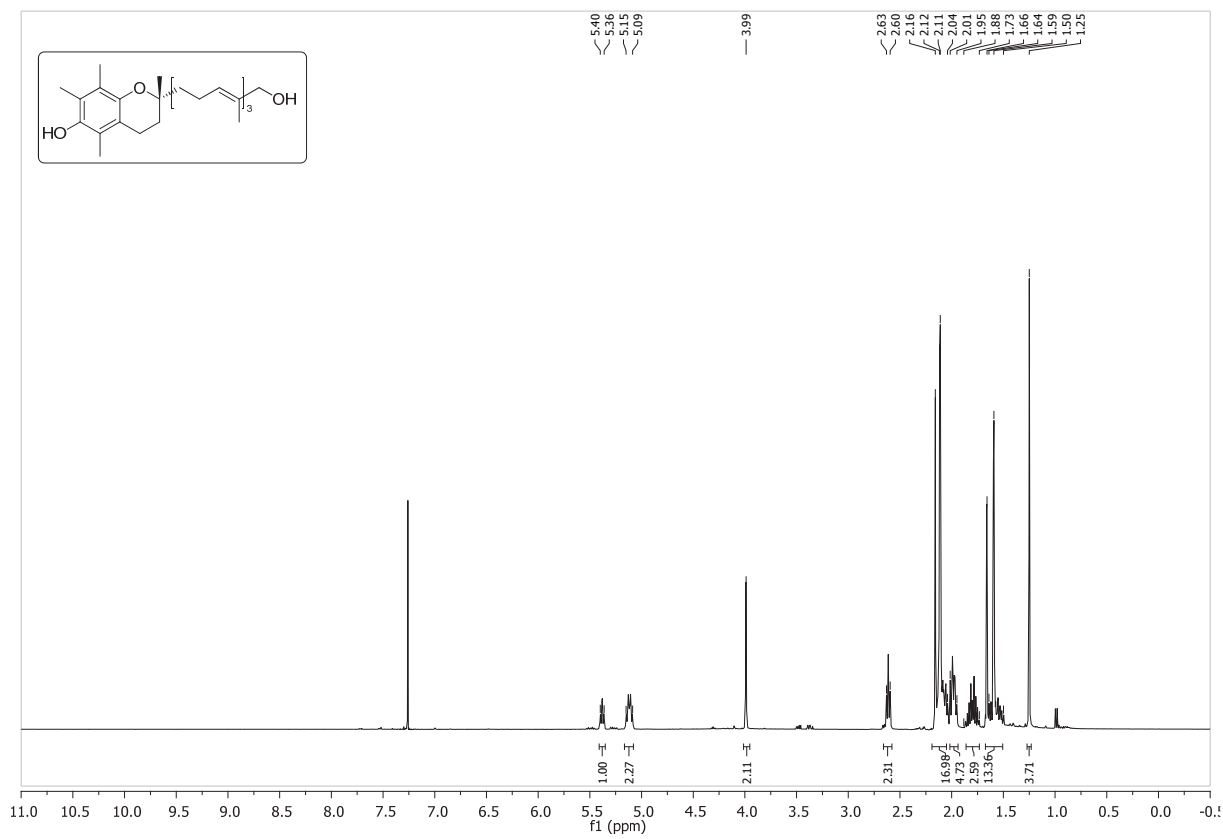

3

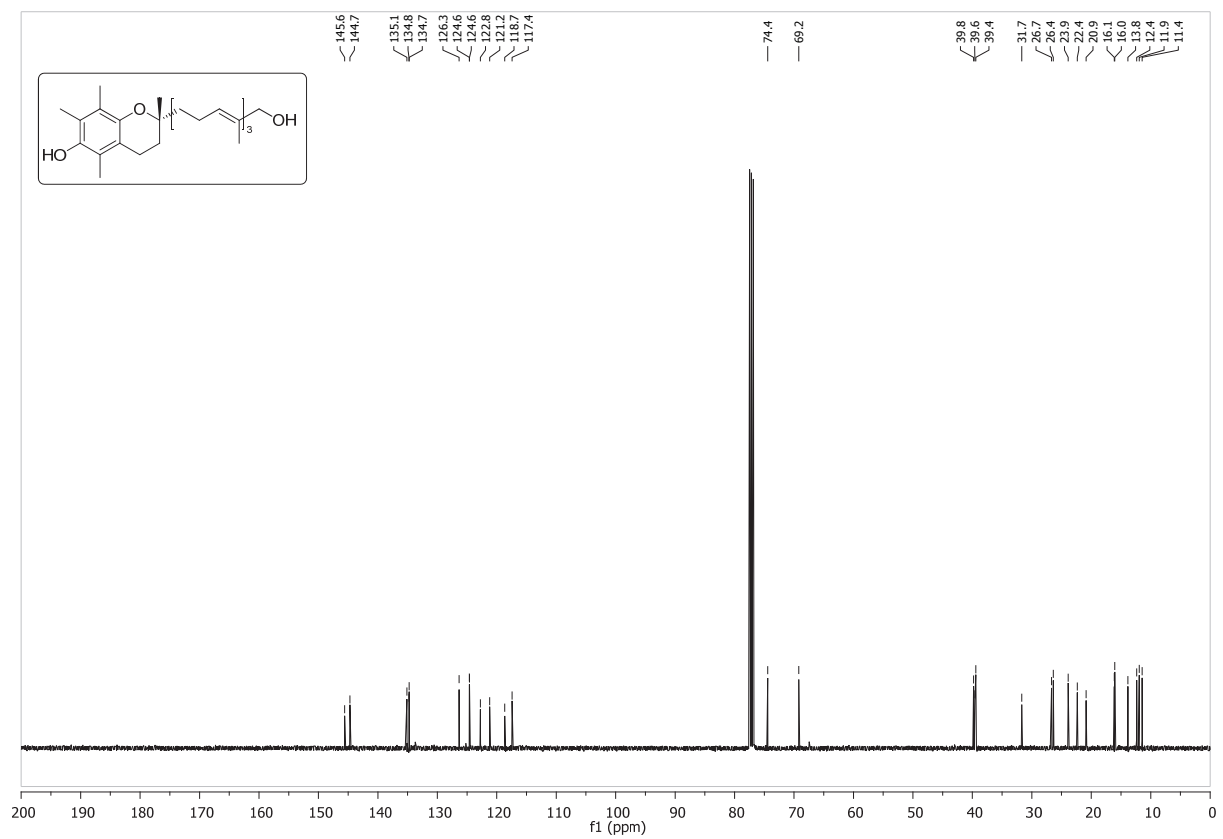

4  
5  
6

$^1\text{H}$  and  $^{13}\text{C}$  NMR spectra of  $\alpha\text{-TE-13'-CH}_2\text{OH}$  (2e) in  $\text{CDCl}_3$

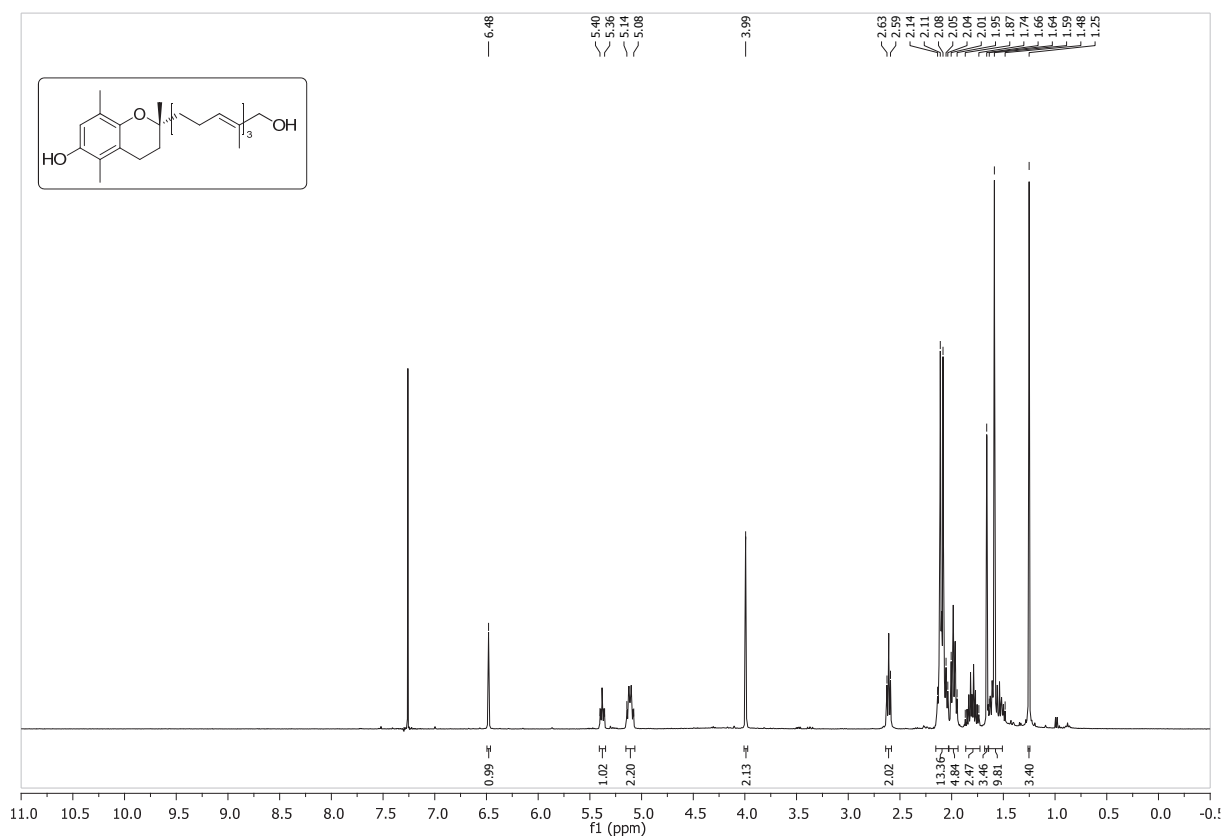

1

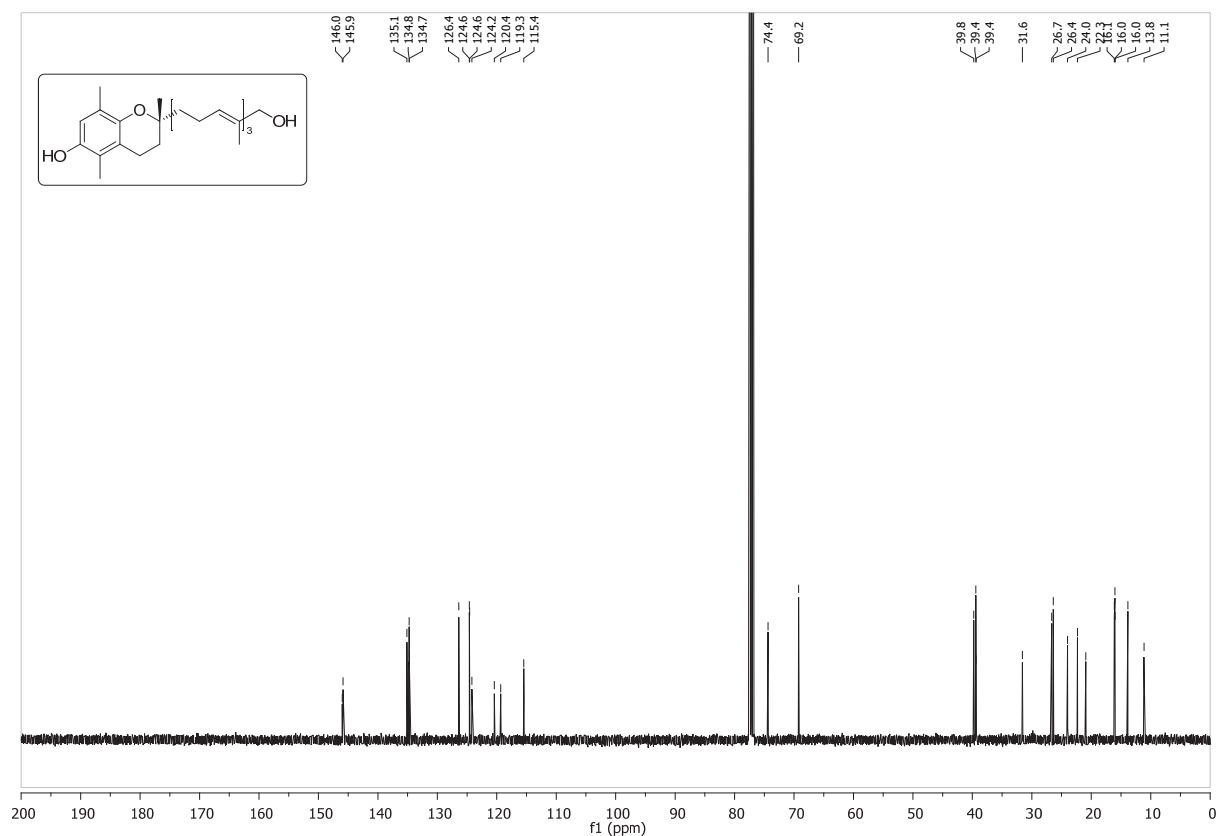

2  
3

<sup>1</sup>H and <sup>13</sup>C NMR spectra of  $\beta$ -TE-13'-CH<sub>2</sub>OH (2f) in CDCl<sub>3</sub>

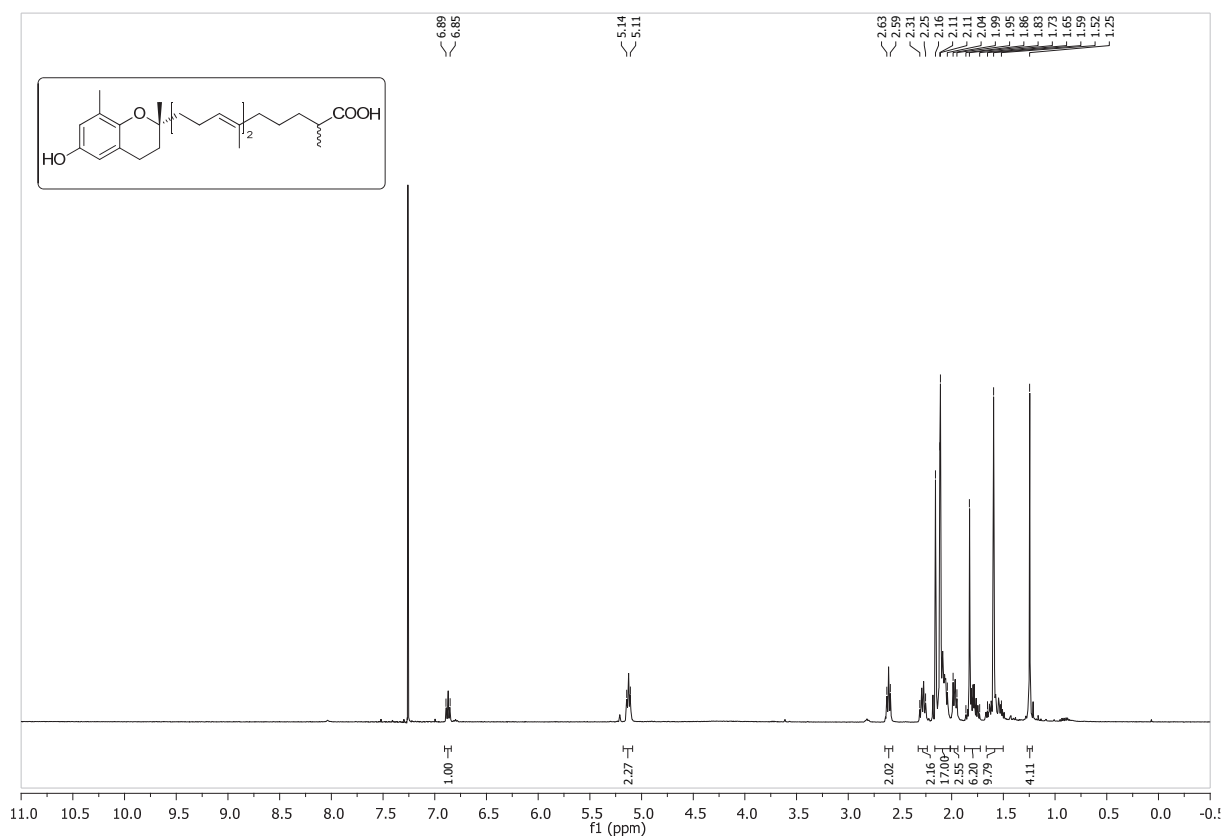

1

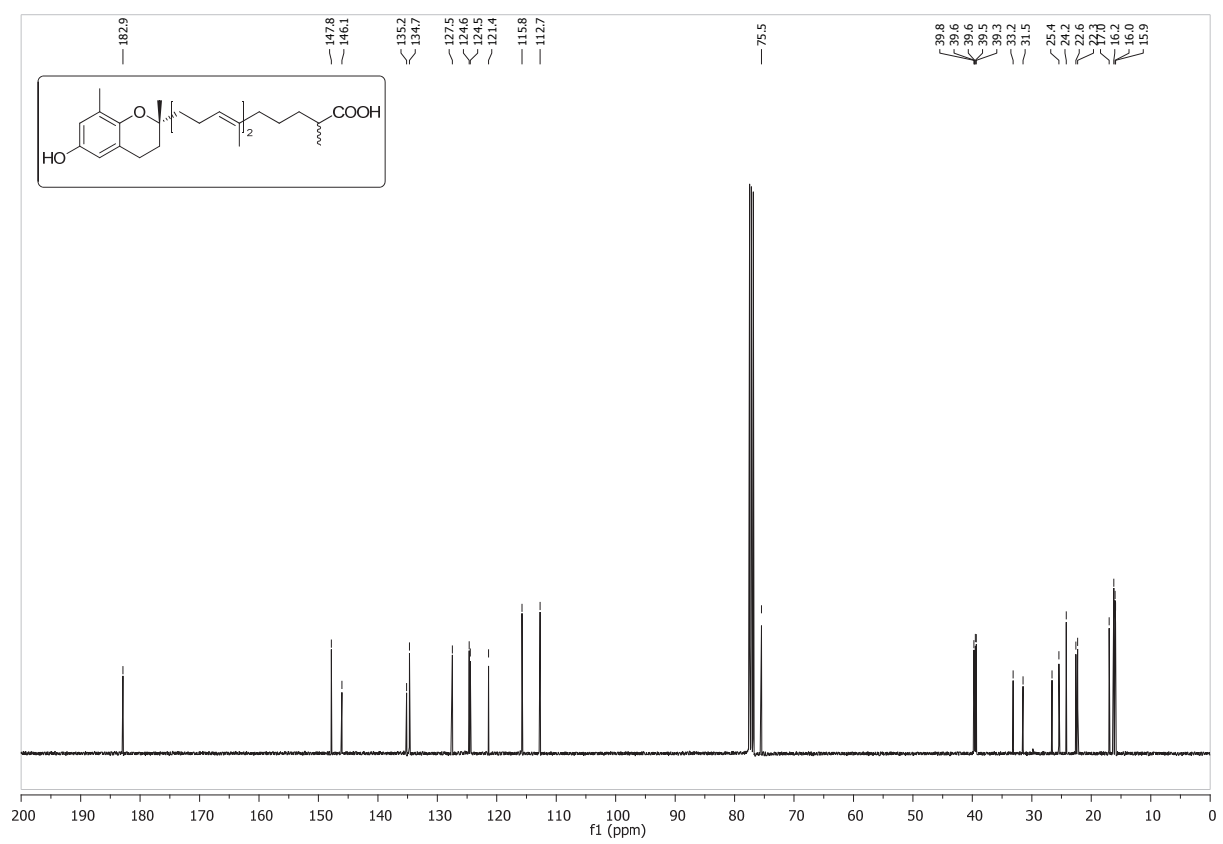

2  
3  
4

<sup>1</sup>H and <sup>13</sup>C NMR spectra of  $\delta$ -DE-13'-COOH (**4**) in CDCl<sub>3</sub>

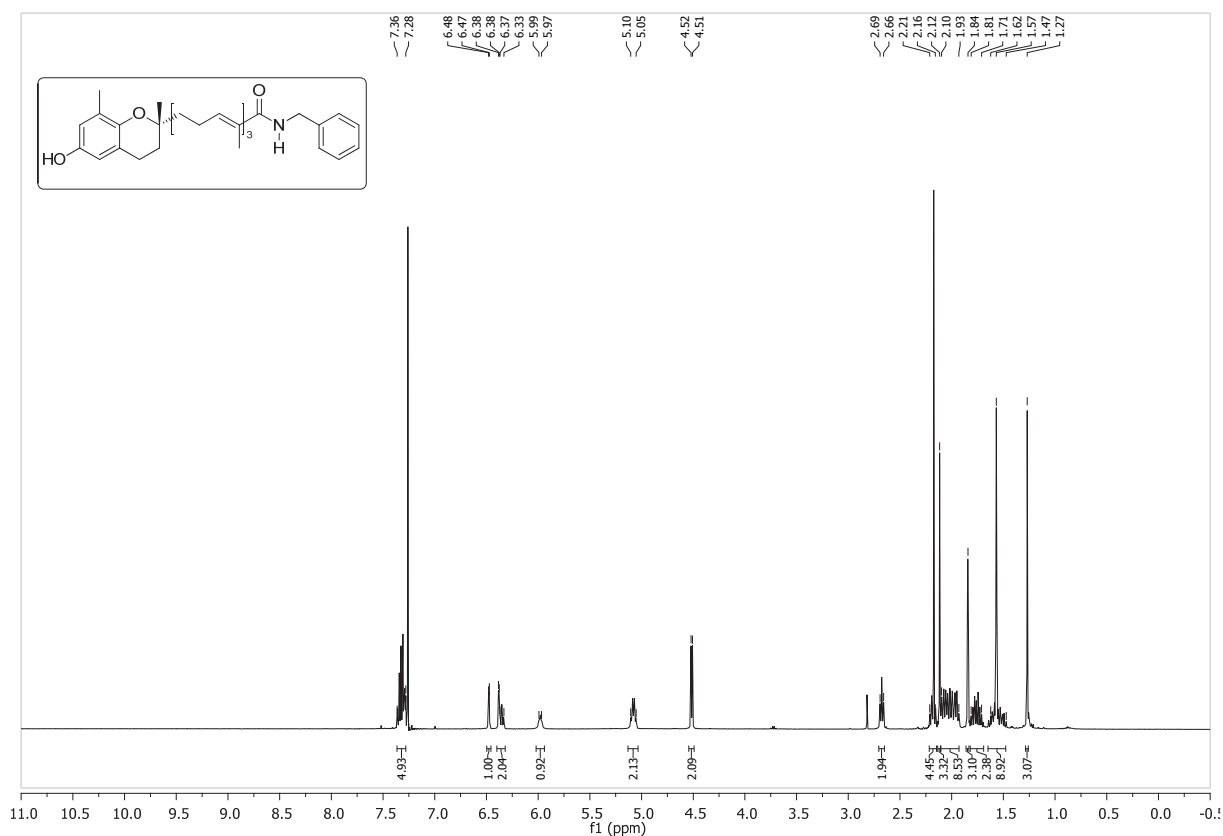

1

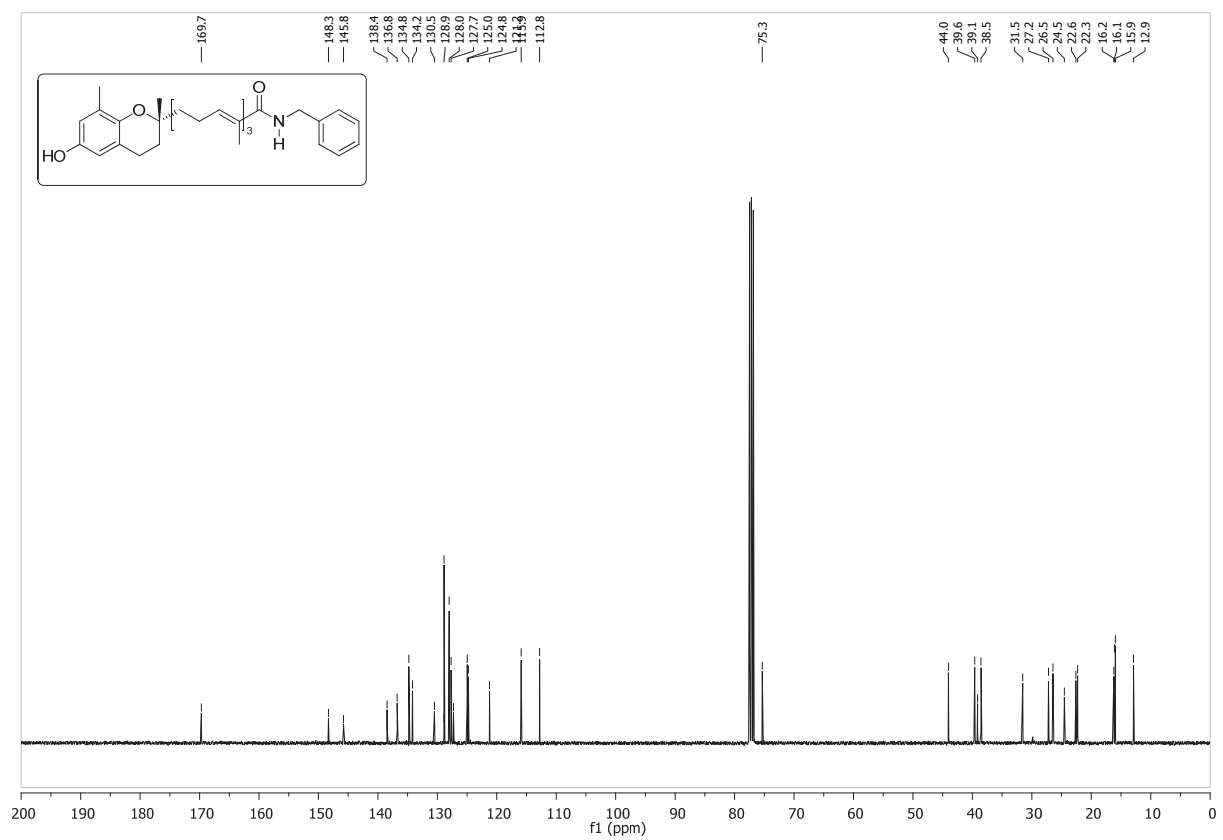

2

3

$^1\text{H}$  and  $^{13}\text{C}$  NMR spectra of  $\delta$ -TE-13'-CONHBz (7) in  $\text{CDCl}_3$

4

1 **Supplementary references**

- 2 1. Korb O, Stutzle T, Exner TE. Empirical scoring functions for advanced protein-ligand  
3 docking with PLANTS. *J Chem Inf Model* **49**, 84-96 (2009)

4
